# Supplementary material for: In-sensor reservoir computing system for latent fingerprint recognition with deep ultraviolet photo-synapses and memristor array
Source: PubMed Central journal article supplement (PMC9633641; doi:10.1038/s41467-022-34230-8), 2022-11-03
Supplement: 41467_2022_34230_MOESM2_ESM.pdf [file 41467_2022_34230_MOESM2_ESM.pdf]

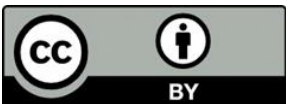

**Open Access** This file is licensed under a Creative Commons Attribution 4.0 International License, which permits use, sharing, adaptation, distribution and reproduction in any medium or format, as long as you give appropriate credit to the original author(s) and the source, provide a link to the Creative Commons license, and indicate if changes were made. In the cases where the authors are anonymous, such as is the case for the reports of anonymous peer reviewers, author attribution should be to 'Anonymous Referee' followed by a clear attribution to the source work. The images or other third party material in this file are included in the article's Creative Commons license, unless indicated otherwise in a credit line to the material. If material is not included in the article's Creative Commons license and your intended use is not permitted by statutory regulation or exceeds the permitted use, you will need to obtain permission directly from the copyright holder. To view a copy of this license, visit <http://creativecommons.org/licenses/by/4.0/>.

## REVIEWER COMMENTS

Reviewer #1 (Remarks to the Author):

In this paper, the authors introduced a deep ultraviolet (DUV) in-sensor reservoir computing (RC) system to perform in-situ latent fingerprint recognition. The proposed system features compactness and high-power efficiency achieved via implementing amorphous Gallium-oxide sensors with enhanced persistent photoconductivity effect to emulate the photo-synapse reservoir layer, whereas the output layer is implemented using HfOx/TaOx based memristive array. During verification, the proposed system is trained and tested with fingerprint images. With that, 90% recognition accuracy is achieved even in the presence of 15% noise.

Suggestions:

- Since there are multiple variants of reservoir networks, it would be useful to include the mathematical model of the reservoir network topology.
- The reservoir networks are known to have lateral connections [feedback] to enable the representation of temporal context. Did the authors use lateral connections? if the answer is no, this cannot be a reservoir network.
- Using the term in-situ implies that the fingerprint recognition, including preprocessing, scaling, etc, is performed on-site, but this is not the case here. All the test images are preprocessed off-site. The same is applied to RC system training.
- In Fig.4-f, is there any explanation for equal classification accuracies of the software and hardware models when the noise level is below 3%? Why is it not the case for higher noise levels?
- I would recommend verifying the proposed RC system with unseen fingerprint images rather than using noisy training images as a test set.
- In the hardware model, the input features are re-represented to expand in the temporal domain. Thus, it is unclear how did the authors employ the conventional backpropagation to train the network.
- The authors mentioned that the proposed system is power efficient as compared to ex-situ latent fingerprint recognition system. Are there any quantitative results to support this claim?
- Given the fact that memristor conductance may change over time, how often do we need to re-train the memristive array of the readout layer to maintain consistent performance?
- In Line 390, it is mentioned “current values of the reservoirs are transmitted to trans-impedance amplifier to convert them into voltage values.” Trans-impedance amplifier converts voltage to current! Thus, the amplifier name should be replaced by trans-resistance amplifier.

- There are a few grammatical mistakes need to be fixed.

Reviewer #2 (Remarks to the Author):

The authors proposed an in-sensor reservoir computing system for in-situ latent fingerprint recognition. In such a system, GaOX photodetector acts as the deep ultraviolet photo-synapses for information input and the memristor array is utilized as the training and readout layer. Systematic experiments have been performed, including the engineering of GaOX component to improve the photo-synapse behavior, mapping of complex input vectors into dimensionality-reduced output vectors, and configuring and simulating of the whole in-sensor reservoir computing system. The authors demonstrate the nonlinear mapping characterization of input and output based on the GaOX photoelectric reservoir and proposed dual-feature strategy for feature sharpening. Especially, this hardware system maintains high accuracy above 90% for fingerprint recognition even under 15% background noise level. This prototype system for image recognition combining photo-synapses and memristors will provide more insight into emerging in-sensor reservoir computing. Overall, the topic of this work is truly interesting. The manuscript is well organized. I would recommend the acceptance if the authors can address below questions.

1. The authors modulate the PPC effect with a longer decay process by decreasing the O contents unilaterally. The authors are suggested to clarify the factors that determine the PPC effect. In addition, please make it clear in the main text, what are the detailed requirements in synapse behavior for in-sensor reservoir computing?
2. The authors mentioned that “the deliberately enlarged PPC effect by Ga-rich design turns the sample S1 into an ideal photo-synapse”. But there must be something wrong in Fig. 2, where the main information about S1, S2, and S3 are missing. Even the main text and caption introduce the figures in details, Fig. 2 and Supplementary Fig. 2 have been mistakenly labelled.
3. The trends during input mapping in Supplementary Fig. 6 and Fig. 7 are similar. How much will the difference in peak value influence the recognition accuracy?
4. The dual-feature strategy sharpens the feature of various inputs and improves the recognition accuracy. But it also increases the burden of the readout layer. Can the authors comment this effect on the overall performance?
5. In Supplementary Fig. 11, pulse stimulations for increment and decrement of memristor conductance are missing. Also, the description of the training method of the memristor array is unclear in method section. The authors should make it more clear.

6. “differentcomplicance” in Supplementary Fig. 9 should be “different compliance”. Please check the English throughout the manuscript.

## 2 **Response to Reviewer's Comments**

3 This Response Letter is regarding a former manuscript submitted to *Nature*  
4 *Communications*, entitled "*In-sensor reservoir computing system for latent*  
5 *fingerprint recognition with deep ultraviolet photo-synapses and memristor array*"  
6 by Zhongfang Zhang et al. (NCOMMS-22-15956). We would like to express our  
7 special thanks to the reviewers, for their useful comments have guided us to improve  
8 the manuscript quality effectively. We revised both the main text and the supplementary  
9 information (SI) accordingly, and the detailed responses to the questions and comments  
10 are summarized. In the following point-to-point response, the original comments are in  
11 black fonts, and our responses are in blue fonts. Changes in the revised main text and  
12 SI are highlighted in yellow.

### 13 14 **I. Comments from Reviewer 1**

#### 15 **Overall Comment:**

16 In this paper, the authors introduced a deep ultraviolet (DUV) in-sensor reservoir  
17 computing (RC) system to perform in-situ latent fingerprint recognition. The proposed  
18 system features compactness and high-power efficiency achieved via implementing  
19 amorphous Gallium-oxide sensors with enhanced persistent photoconductivity effect to  
20 emulate the photo-synapse reservoir layer, whereas the output layer is implemented  
21 using  $\text{HfO}_x/\text{TaO}_x$  based memristive array. During verification, the proposed system is  
22 trained and tested with fingerprint images. With that, 90% recognition accuracy is  
23 achieved even in the presence of 15% noise.

24 **Reply to Overall Comment:** We thank the referee for the precious time and  
25 constructive comments on our manuscript. Our responses to the comments one by one  
26 are shown as follows.

27  
28 **Comment 1:** Since there are multiple variants of reservoir networks, it would be useful  
29 to include the mathematical model of the reservoir network topology.

30 **Reply to Comment 1:** We thank the reviewer for this suggestive comment.

31 The echo state network (ESN) is a fitted model for understanding a general RC  
32 architecture, as shown in Fig. R1a. The I/O relationships can be represented by the

33 formulas:

$$34 \quad x(t + 1) = f(W_{res} \cdot x(t) + W_{in} \cdot u(t))$$

$$35 \quad y(t) = W_{out} \cdot x(t)$$

36 Among ESN models, the delayed-feedback system is mostly suitable for temporal  
 37 information classification. The excitations of the physical node in response to the  
 38 delayed signals can effectively act as a chain of virtual nodes, as shown in Fig. R1b.  
 39 The temporal transformation of the reservoir state can be represented by the formula:

$$40 \quad dx(t)/dt = F(t, x(t), x(t - \tau))$$

$$41 \quad \theta = \tau/N$$

42 where  $F$  is the system function determined by intrinsic material properties,  $\tau$  is the  
 43 duration time,  $N$  is the number of nodes, and  $\theta$  is the time-step. According to the above  
 44 characteristics, we can conclude that the performance of the device used for RC requires  
 45 two features: the nonlinear response to continuous input and the short-term decay  
 46 characteristic, which are also theoretically explained in other works<sup>R1, 2</sup>.

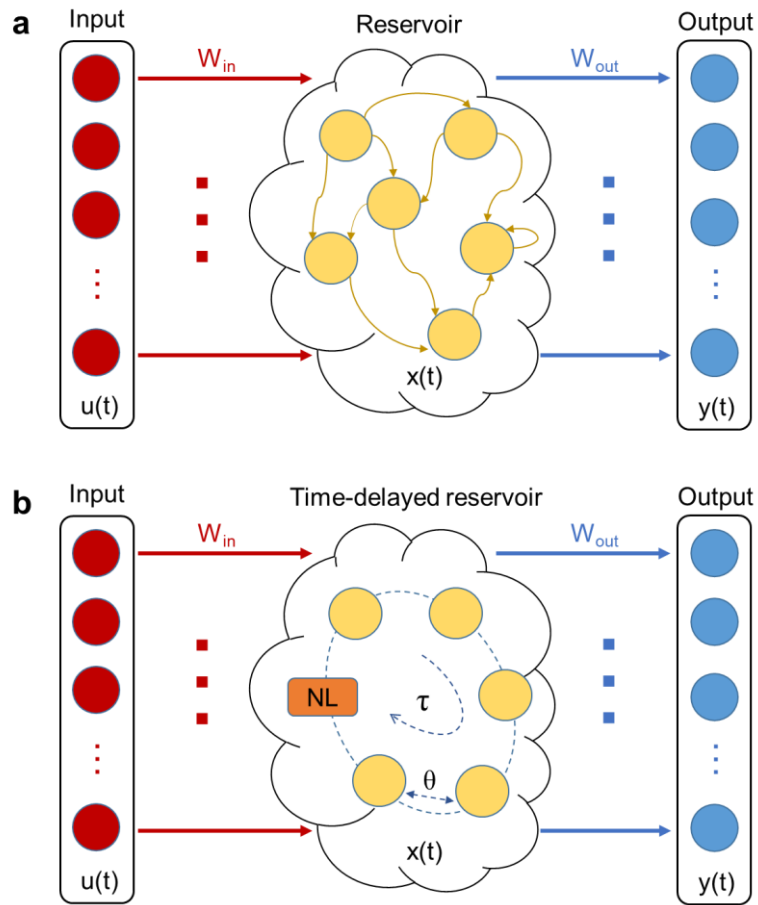

47

48 **Fig. R1 Schematic diagram of the mathematical model of the typical RC topology.**

49 **a** General echo state network model. **b** Delayed-feedback RC model.

50

51 In order to further confirm that the device meets the above two characteristics,  
52 according to the suggestions of the reviewer, we further analyzed the nonlinear response  
53 curves of the device, as shown in Fig. R2. The response formula under continuous light  
54 input and the decay formula after light input of the device have been analyzed:

55 i) The response function can be represented by:

$$56 \quad R = R_0 + A [1 - \exp(-(t-t_0)/\tau)]$$

$$57 \quad A = f(R_0)$$

$$58 \quad \tau = g(R_0)$$

59 where  $R_0$  is the initial current of the response process,  $A$  is the difference between  $R(\infty)$   
60 and  $R_0$ , and  $t_0$  is the starting time of the response process. The fitting parameters  $A$  and  
61  $\tau$  are related to the initial current state  $R_0$ , and the functions  $f$  and  $g$  are both determined  
62 by the intrinsic characteristics of the device and the input light power.

63 Thus, the fitting result of the example in Fig. R2 is extracted to be:

$$64 \quad R = 4 + 39 [1 - \exp(-(t-t_0)/108)]$$

65 where  $R$  is in nA and  $t-t_0$  is in ms.

66 ii) The decay functions can be represented by:

$$67 \quad D = D_0 - A' [1 - \exp(-(t-t_0)/\tau')]$$

$$68 \quad A' = r(D_0)$$

$$69 \quad \tau' = s(D_0)$$

70 where  $D_0$  is the initial current of the decay process,  $A'$  is the difference between  $D_0$  and  
71  $D(\infty)$ , and  $t_0$  is the starting time of the decay process. The fitting parameters  $A'$  and  $\tau'$   
72 are related to the initial current state  $D_0$ , and the functions  $r$  and  $s$  are both determined  
73 by the intrinsic characteristics of the device.

74 Thus, the fitting result of the example in Fig. R2 is extracted to be:

$$75 \quad D = 26 - 10 [1 - \exp(-(t-t_0)/47)]$$

76 where  $D$  is in nA and  $t-t_0$  is in ms.

77 From these two processes, we can deduce that the characteristics of the device can meet  
78 the requirements for RC.

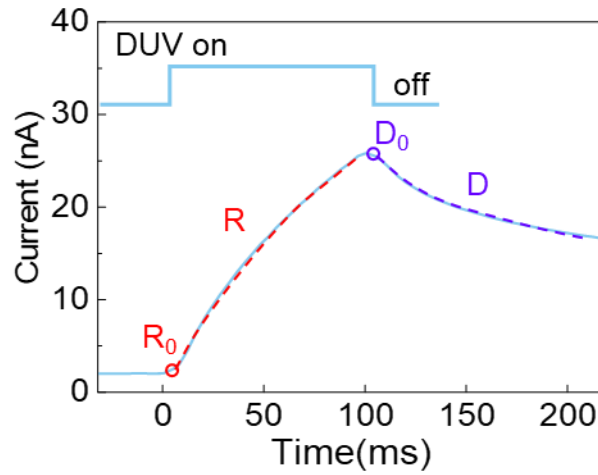

79

80 **Fig. R2 Nonlinear functions (current versus time) extracted from the**  
 81 **photoresponse curves of the device.** The response function under continuous light  
 82 input is represented by  $R$  and the decay function is represented by  $D$ .

83

84 In this work, referring to the time-delayed reservoir model, we built a parallel  
 85 architecture of the time-delayed reservoir. As shown in Fig. R3, the dots in yellow  
 86 actually represent the virtual nodes, which are set at the pulse ending edge with a fixed  
 87 interval  $\theta$ . For the designed readout, only the last 1 or 2 nodes are utilized to construct  
 88 the output vector. Multiple reservoirs in parallel are utilized to accomplish one  
 89 comprehensive output from a binary image. As for the RC network training, only the  
 90 readout matrix ( $W_{out}$ ) needs to be trained, and all the other connections are fixed<sup>R3,4</sup>.



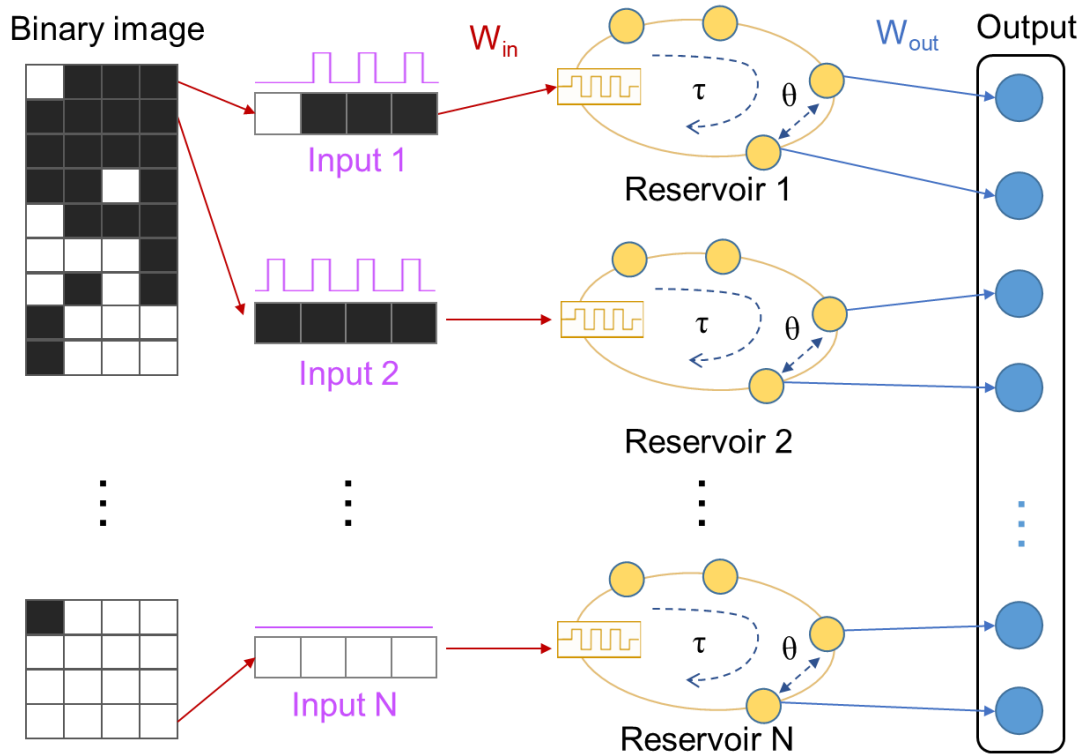

91

92 **Fig. R3 Schematic diagram of the parallel time-delayed reservoir network as a**  
 93 **demonstration of our work.** The image is divided suitably then inputted into the  
 94 reservoirs in parallel. The virtual nodes of each reservoir are coupled with a time  
 95 interval  $\theta$ . For the designed readout network, only the last 1 or 2 nodes of each reservoir  
 96 are utilized to construct the output vector.

97

98 According to this comment, we have supplemented the relevant figures and  
 99 demonstrated the mathematical model:

100 (main text, **Fingerprint recognition with fully-hardware DUV in-sensor RC system,**  
 101 **Paragraph 1)**

102 “To verify the feasibility of DUV in-sensor RC for fingerprint recognition, we  
 103 constructed a hardware system, composed of a photo-synapse reservoir layer and a  
 104 memristor readout layer, as shown in Fig. 4a. The relationship between the  
 105 mathematical model and the physical hardware of this system has been illustrated (see  
 106 Supplementary Fig. 8). In such a system for DUV fingerprint recognition, the images  
 107 are first converted into DUV light pulses.”

108 (SI, **Supplementary Fig. 8)**

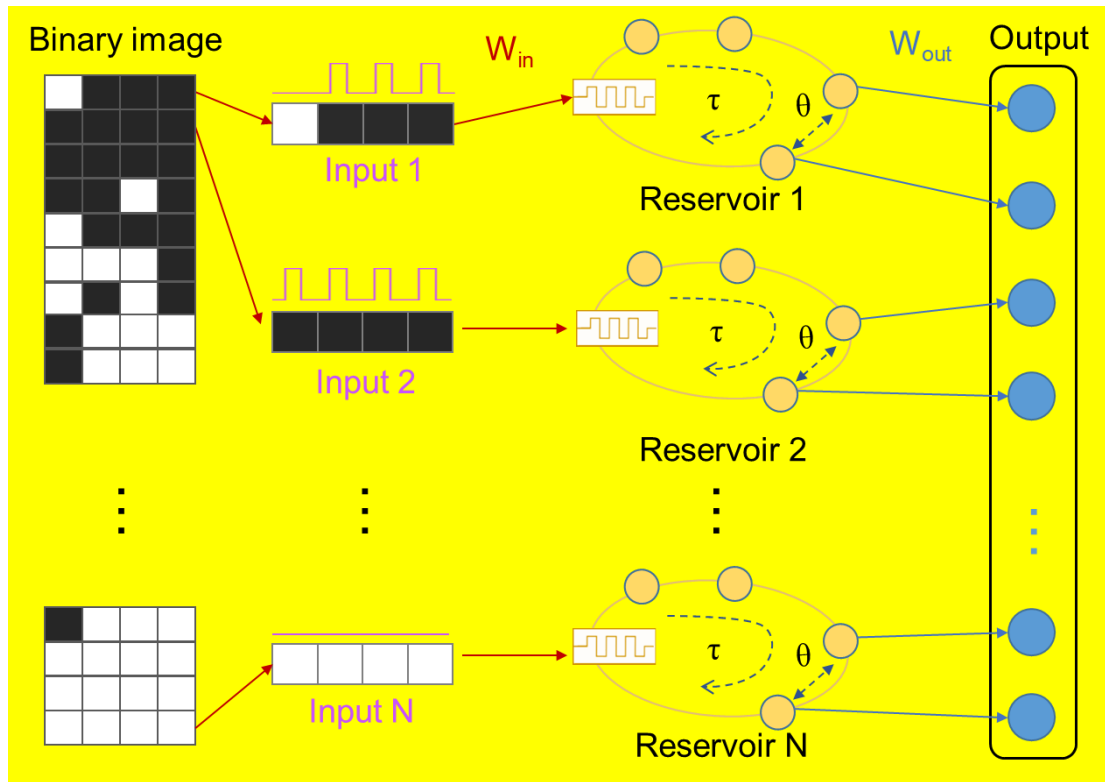

110

111 **Supplementary Fig. 8 Schematic diagram of the parallel time-delayed reservoir**  
 112 **network as a demonstration of our work.** The image is divided suitably then input  
 113 into the reservoirs in parallel. The virtual nodes of each reservoir are coupled with a  
 114 time interval  $\theta$ . For the designed readout network, only the last 1 or 2 nodes of each  
 115 reservoir are utilized to construct the output vector.”

116

117 **Comment 2:** The reservoir networks are known to have lateral connections [feedback]  
 118 to enable the representation of temporal context. Did the authors use lateral connections?  
 119 if the answer is no, this cannot be a reservoir network.

120 **Reply to Comment 2:** We thank the reviewer for this suggestive comment.

121 The schematic of the lateral connections can be reflected in our reservoir model (Fig.  
 122 R3), since the state change of the reservoir is not only related to external input, but also  
 123 related to the real-time state of the reservoir (conductivity of the device). Despite the  
 124 independence of multiple reservoirs, the lateral connections do exist between the virtual  
 125 nodes of one reservoir, which can be reflected by the time-dependent pulse responses  
 126 of I-t curves. As an example, although the last pulse is the same “1”, the sampling

127 currents (SMP1) of “1101”, “0011” and “0001” are different, as shown in Fig. R4. If  
128 there is no lateral connection (feedback), the current obtained will only be related to the  
129 last input (namely “1”) in the 4-bit sequences.

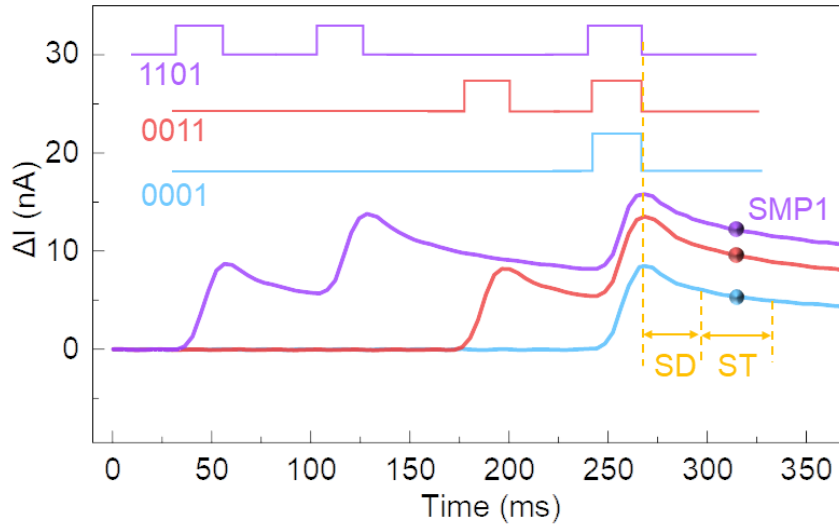

130

131 **Fig. R4** A typical example of lateral connection by different 4-bit pulse inputs,  
132 including “1101”, “0011”, and “0001”. Although the last pulse is “1”, the  
133 characteristic currents (SMP1) of “1101”, “0011” and “0001” are different. The state  
134 change of the reservoir is not only related to external input, but also related to the real-  
135 time state of the reservoir.

136

137 According to this comment, we have supplemented correlated sentences in the main  
138 text (**Nonlinear mapping of 4-bit inputs of the a-GaO<sub>x</sub> DUV reservoir, Paragraph**  
139 **2**): “To illustrate the feature sampling, the I-t curves of three representative inputs of  
140 “0001” (in blue), “0011” (in red), and “1101” (in purple) of the a-GaO<sub>x</sub> reservoir are  
141 exhibited in Fig. 3b. Although the last pulses are all “1”, their decay processes after the  
142 input sequences are different. Therefore, the final state of the reservoir not only relates  
143 to the last input, but also depends on its real-time state, indicating the lateral  
144 connections in such an a-GaO<sub>x</sub> reservoir<sup>21,22</sup>. Based on the conspicuous difference, each  
145 pixel sequence can be featured by current sampling to realize feature extraction”.

146

147 **Comment 3:** Using the term in-situ implies that the fingerprint recognition, including

148 preprocessing, scaling, *etc.*, is performed on-site, but this is not the case here. All the  
149 test images are preprocessed off-site. The same is applied to RC system training.

150 **Reply to Comment 3:** We thank the reviewer for this helpful comment. It is reasonable  
151 to say that the image preprocessing is obviously not in situ. The reason for our  
152 preprocessing is that the off-site is limited by the size of the memristor array. Therefore,  
153 we reasonably believe that this work verifies the prototype of a fingerprint recognition  
154 system and provides potential inspirations for the realization of in-situ fingerprint  
155 recognition system.

156 According to the reviewer's comment, we have corrected the descriptions about "in-  
157 situ" in the main text and SI, especially the title of this work.

158 The revised title is "**In-sensor reservoir computing system for latent fingerprint**  
159 **recognition with deep ultraviolet photo-synapses and memristor array**".

160 Other revisions about "in-situ" in the revised main text and SI are all highlighted in  
161 yellow.

162

163 **Comment 4:** In Fig.4-f, is there any explanation for equal classification accuracies of  
164 the software and hardware models when the noise level is below 3%? Why is it not the  
165 case for higher noise levels?

166 **Reply to Comment 4:** We thank the reviewer for this helpful comment.

167 The fingerprint images with increasing noise levels are exhibited with different  
168 resolutions, as shown in Fig. R5, in which the binary images are the most crucial. While  
169 the noise level is below 3%, the noise is negligible and the difference between the  
170 training set and the test set is not obvious. This as-trained weight matrix can be  
171 competent for the recognition task through both the simulation and the hardware,  
172 leading to the relatively close classification accuracies.

173 Most pixels in the binary image have changed at above 3% noise level, visible to the  
174 naked eye. The weight matrix of software simulation is based on double-floating  
175 number, while the precision of hardware (memristor) is limited by the quantity of the  
176 controllable conductance states. In addition, there are various device non-idealities of  
177 memristor hardware (*e.g.*, device-to-device and cycle-to-cycle variations, discreteness

178 of operations, *etc.*), which will lead to the attenuation of accuracies with the  
 179 introduction of noises. According to the above factors, the gap of accuracy between the  
 180 software and hardware model becomes increasingly obvious with the increase of noise  
 181 level.

182 In summary, the main factors resulting in the differences in classification accuracies  
 183 could be as follows: i) the images exhibit apparent changes when the noise level is  
 184 above 3%. ii) the limited conductance states of the memristor hardware affect the  
 185 calculation precision of the readout layer. Similarly, in the reports of Midya. R. *et. al.*<sup>R5</sup>,  
 186 the recognition accuracy of hardware verification also faces attenuation while  
 187 increasing the noise.

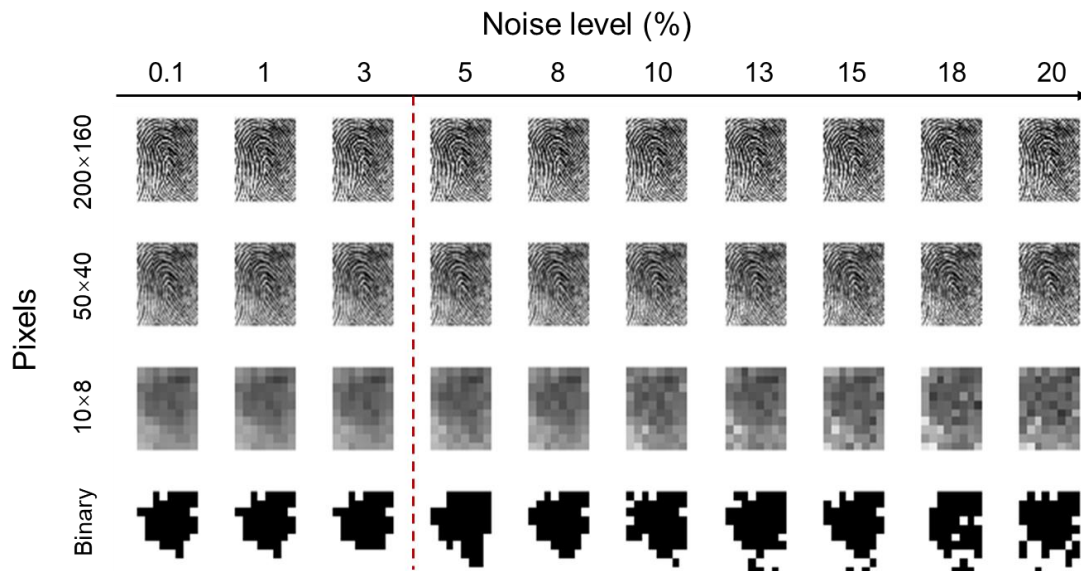

188

189 **Fig. R5 Representative fingerprint images with increasing noise levels displayed**  
 190 **in different pixel sizes.** While the noise level is below 3%, the changes of the binary  
 191 image only take place in a few pixels; however, when the noise level is above 3%, the  
 192 features of most pixels in the image have changed obviously, even visible to the naked  
 193 eye.

194

195 According to this comment, we have supplemented the correlated sentences in the main  
 196 text (**Fingerprint recognition with fully-hardware DUV in-sensor RC system,**  
 197 **Paragraph 3**):

198 “Three situations, full-precision (double-precision floating-point) simulation, limited-

199 precision (32-bit fixed-point quantization) simulation, and hardware experiment, are  
200 considered for comparison. As shown in Fig. 4f, recognition accuracies in all situations  
201 remain comparable under  $\leq 3\%$  noise level and deteriorate asynchronously with its  
202 increment. The limited resistive states of the memristor device and the amplification of  
203 non-ideal factors (*e.g.*, device-to-device and cycle-to-cycle variations, discreteness of  
204 operations, etc.) under high-level noise dominate the relatively quick deterioration in  
205 the hardware situation. Therefore, the improvement of resistive states and uniformity  
206 of the memristor devices could further improve the system robustness<sup>51</sup>. It is  
207 noteworthy that the recognition accuracy of the hardware experiment still maintains  
208 above 90% under 15% noise level. In summary, the fully-hardware DUV in-sensor RC  
209 system based on a-GaO<sub>x</sub> photo-synapse has promising potential to be competent for  
210 high-precision in-situ DUV fingerprint recognition tasks.”

211

212 **Comment 5:** I would recommend verifying the proposed RC system with unseen  
213 fingerprint images rather than using noisy training images as a test set.

214 **Reply to Comment 5:** We thank the reviewer for this helpful comment. The noises for  
215 practical recognition scenes inspired us to perform such a comparison in the original  
216 manuscript. According to the reviewer’s comment, we also supplemented the  
217 simulation experiment with the proposed method.

218 Unlike the large MNIST handwriting database, this fingerprint database (Fingerprint  
219 Verification Competition 2002 database) has relatively small sample size. There are  
220 only 8 fingerprint images for each person in the original data set, which is limited for  
221 the division of the training and test sets. Thus, we conducted a simple extension of the  
222 data set by introducing one random noise pixel in the binary image for 10 times, thus,  
223 there are 80 available images for each person, with a total of 400 images. Then, we  
224 divide the extended fingerprint images into the 80% training set and the 20% test set  
225 (namely the unseen images), as shown in Fig. R6a. By utilizing the dual-feature strategy  
226 of the reservoir, the simulated recognition accuracy for trained fingerprint images is  
227 beyond 96% after 1000 training epochs, as shown in Fig. R6b. As for the test set, the  
228 confusion matrix is shown in Fig. R6c, indicating an excellent recognition accuracy of  
229 92.5% for the recognition of the unseen images.

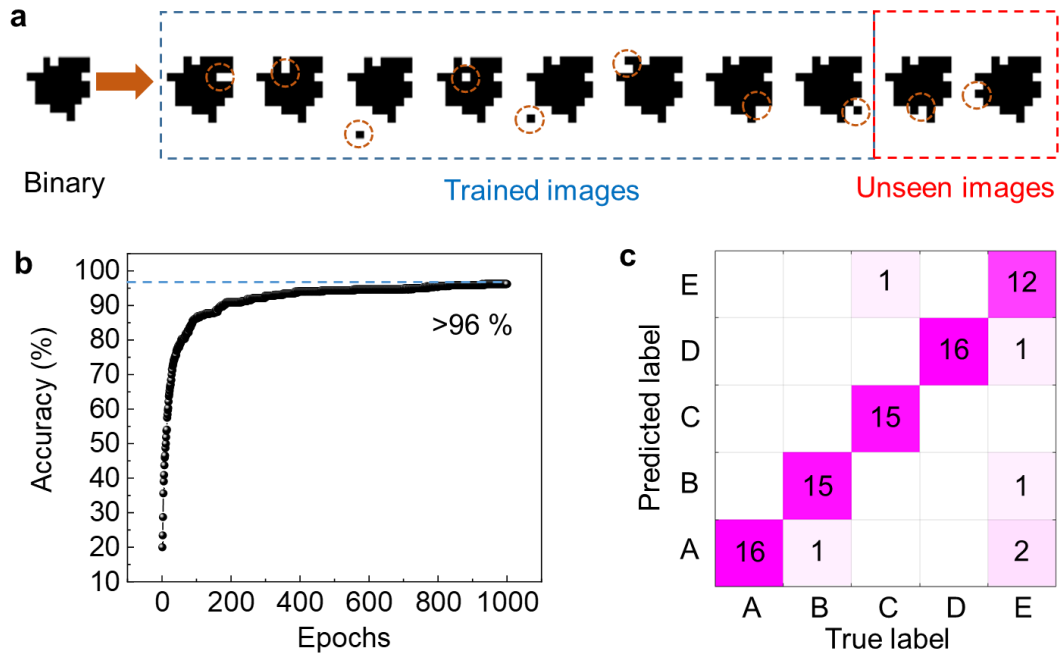

230

231 **Fig. R6 Recognition simulation of the unseen fingerprint images.** **a** Expansion of  
 232 the data set of the fingerprints from 40 to 400 images by introducing one random noise  
 233 pixel in each binary image for 10 times (taking the C-1 image in Supplementary Fig.  
 234 10 as an example), owing to the finite scale of the FVC 2002 database. 80% of the  
 235 fingerprint images were set as the training set and the other 20% as the test set (namely  
 236 the unseen images). **b** Accuracy convergency during the training process within 1000  
 237 epochs. Considerable recognition accuracy can be achieved upon certain training  
 238 epochs. **c** Confusion matrix of the fingerprint recognition with the unseen images as the  
 239 test set. The test accuracy is extracted to be 92.5%.

240

241 According to this comment, we have supplemented the recognition simulation of  
 242 untrained fingerprint images and added correlated contents in both main text and  
 243 Supplementary Information:

244 (main text, **Fingerprint recognition with fully-hardware DUV in-sensor RC system,**  
 245 **Paragraph 1)**

246 “Thus, a dual-feature strategy is employed, and only a dimensionality-reduced 40×5  
 247 weight matrix needs to be trained for each fingerprint image. As an example, a  
 248 recognition accuracy for unseen fingerprint images has been simulated to be around 92%  
 249 based on this dual-feature strategy, where the expanded sample amounts of the

250 fingerprint images ensure the high recognition accuracy (see Supplementary Fig. 11).”

251 (SI, Supplementary Fig. 11)

252 “

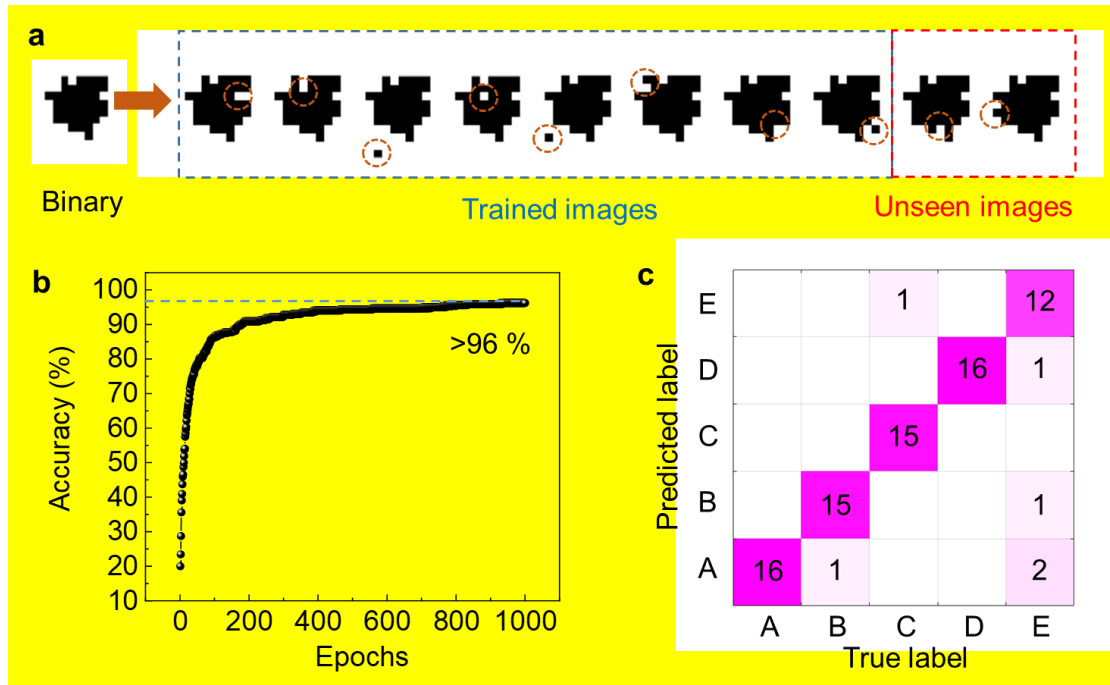

253

254 **Supplementary Fig. 11 Recognition simulation of the unseen fingerprint images. a**

255 Expansion of the data set of the fingerprints from 40 to 400 images by introducing one

256 random noise pixel in each original image for 10 times (taking the C-1 image in

257 Supplementary Fig. 10 as an example), owing to the finite scale of the FVC 2002

258 database. 80% of the fingerprint images were set as the training set and the other 20%

259 as the test set (namely the unseen images). **b** Accuracy convergency of the training

260 process within 1000 epochs. Considerable recognition accuracy can be achieved upon

261 certain training epochs. **c** Confusion matrix of the fingerprint recognition with the

262 unseen images as the test set. The test accuracy is extracted to be 92.5%.”

263

264 **Comment 6:** In the hardware model, the input features are re-represented to expand in

265 the temporal domain. Thus, it is unclear how did the authors employ the conventional

266 backpropagation to train the network.

267 **Reply to Comment 6:** We thank the reviewer for this comment. The backpropagation

268 is usually applied in multilayer neural networks, updating the weights from the output



269 layer to the input layer. In our work, we only train the single-layer readout network and  
270 select the Softmax as the output function, then the readout weights are updated by  
271 logistic regression to minimize the loss. Unlike the traditional method in multilayer  
272 neural networks, the backpropagation algorithm is not used in the training process,  
273 since the weights in the reservoir are always fixed.

274 According to this comment, we have corrected the descriptions of the readout network  
275 training methods (**Methods, Network training**):

276 “The fully-connected network was trained by the MATLAB Deep-learning Toolbox,  
277 utilizing the Softmax output function and the logistic regression to supervise the  
278 learning. The stochastic noise was made by the product of the MATLAB randn matrix  
279 and the grayscale value throughout the whole image.”

280

281 **Comment 7:** The authors mentioned that the proposed system is power efficient as  
282 compared to ex-situ latent fingerprint recognition system. Are there any quantitative  
283 results to support this claim?

284 **Reply to Comment 7:** We thank the reviewer for this helpful comment.

285 The energy consumption of our system includes optoelectronic reservoirs and  
286 memristor array. From the perspective of quantitative calculation, the power  
287 consumption of the optoelectronic reservoir can be extracted by the formula  $E=IVt$ . In  
288 our work, by setting 20 nA as the average current of the reservoir state (see Fig. 3d in  
289 the main text), the energy consumption per pulse operation of the reservoir is calculated  
290 to be  $E=20 \text{ nA} \times 1 \text{ V} \times 25 \text{ ms}=0.5 \text{ nJ}$ . Using the same calculation method, the similar  
291 optoelectronic synapse in previous report costs approximately 85 nJ per operation of  
292 optical information processing<sup>R6</sup>, indicating that the optoelectronic reservoir in our  
293 work is much more energy-efficient than the former report. In addition, this pulse  
294 operation of the reservoir contains both the sensing and processing of the optical  
295 temporal information. The traditional systems require sensors and photoelectric signal  
296 converters, while the increased energy consumption of these additional parts is usually  
297 not mentioned in the reports to conduct quantitative calculation<sup>R3, 7</sup>.

298 As for the training consumption, taking the SET operation of one memristor device as  
299 an example (see Supplementary Fig. 12), the power consumption can be approximately  
300 extracted by  $E'=gV^2t=300 \text{ } \mu\text{S} \times (2.5 \text{ V})^2 \times 500 \text{ } \mu\text{s}=0.938 \text{ } \mu\text{J}$ . Actually, we have

301 introduced the dimensionality-reduced conception in our work, which means the  
302 introduction of the reservoir architecture will reduce the scale of memristor array for  
303 the readout training. Taking the 10×8 image in our work as an example, if there is no  
304 in-sensor reservoir, the readout network requires 800 (80×5×2) memristor devices. By  
305 utilizing the dual-feature strategy of 20 reservoirs, the amounts of memristor will  
306 decline by half. Since the energy consumption of a memristor is approximately 1000  
307 times larger than that of a reservoir, we can deduce that the reduction of dimensionality  
308 is valuable for the overall energy-efficiency. Therefore, from the quantitative  
309 calculation, the reservoir architecture in our work possesses potential energy-efficient  
310 characteristic.

311

312 According to this comment, we have updated the demonstrations of the energy  
313 consumption of the reservoir (**Nonlinear mapping of 4-bit inputs of the a-GaO<sub>x</sub> DUV  
314 reservoir, Paragraph 3**):

315 “Consequently, the feature space based on nonlinear photoresponse configures the  
316 classification process of the reservoir, reducing the dimensionality of raw data from 4-  
317 bit digital inputs to 2 analog outputs that serve as the inputs of the linear readout layer<sup>49</sup>,  
318 <sup>50</sup>. The energy consumption per pulse operation of the optoelectronic reservoir can be  
319 estimated to be  $E=20\text{ nA}\times 1\text{ V}\times 25\text{ ms}=0.5\text{ nJ}$ , indicating that the reservoir architecture  
320 possesses potential energy-efficient characteristic.”

321

322 **Comment 8:** Given the fact that memristor conductance may change over time, how  
323 often do we need to re-train the memristive array of the readout layer to maintain  
324 consistent performance?

325 **Reply to Comment 8:** We thank the reviewer for this comment. Considering the  
326 resistance decay of the memristor, the retention characteristic measurement of our  
327 memristor is conducted by 150 minutes, as shown in Supplementary Fig. 13. Therefore,  
328 within the retention time, re-train is not necessary. Namely, the re-train time is greater  
329 than 150 minutes, which is comparable to the previous reports<sup>R8</sup>, and sufficient for an  
330 identification system.

331

332 **Comment 9:** In Line 390, it is mentioned “current values of the reservoirs are  
333 transmitted to trans-impedance amplifier to convert them into voltage values.” Trans-  
334 impedance amplifier converts voltage to current! Thus, the amplifier name should be  
335 replaced by trans-resistance amplifier.

336 **Reply to Comment 9:** We thank the reviewer for this comment. Maybe there are some  
337 misunderstandings in the English expression of the circuit element, since the nouns  
338 “impedance” and “resistance” represent the similar physical quantity in ohm ( $\Omega$ ). A  
339 trans-impedance amplifier is usually utilized to convert the current signals to voltage  
340 signals<sup>R5,9</sup>, as shown in Fig. R7. When the resistance  $R$  is fixed,  $V_{out}$  could be a simple  
341 multiplication of the analog current of reservoir  $I_i$  and the constant  $R$ , implementing the  
342 function of converting the current value into a voltage value.

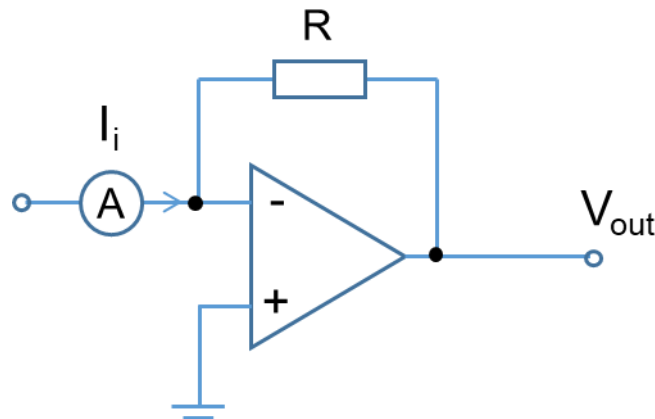

343

344 **Fig. R7 Schematic diagram of a trans-impedance amplifier (TIA) model in our**  
345 **work.** In this work, the TIA elements convert the current outputs of the reservoirs into  
346 voltage values, namely  $V_{out}=I_iR$ .

347

348 **Comment 10:** There are a few grammatical mistakes need to be fixed.

349 **Reply to Comment 10:** We thank the reviewer for this helpful comment. According  
350 to the reviewer’s comments. The English expression of the full text has been checked  
351 and polished. All the revisions about typos and grammar in the revised main text and  
352 SI are highlighted in yellow.

353

354 **II. Comments from Reviewer 2**

355 **Overall Comment:**

356 The authors proposed an in-sensor reservoir computing system for in-situ latent  
357 fingerprint recognition. In such a system, GaO<sub>x</sub> photodetector acts as the deep  
358 ultraviolet photo-synapses for information input and the memristor array is utilized as  
359 the training and readout layer. Systematic experiments have been performed, including  
360 the engineering of GaO<sub>x</sub> component to improve the photo-synapse behavior, mapping  
361 of complex input vectors into dimensionality-reduced output vectors, and configuring  
362 and simulating of the whole in-sensor reservoir computing system. The authors  
363 demonstrate the nonlinear mapping characterization of input and output based on the  
364 GaO<sub>x</sub> photoelectric reservoir and proposed dual-feature strategy for feature sharpening.  
365 Especially, this hardware system maintains high accuracy above 90% for fingerprint  
366 recognition even under 15% background noise level. This prototype system for image  
367 recognition combing photo-synapses and memristors will provide more insight into  
368 emerging in-sensor reservoir computing. Overall, the topic of this work is truly  
369 interesting. The manuscript is well organized. I would recommend the acceptance if the  
370 authors can address below questions.

371 **Reply to Overall Comment:** We thank the referee for the positive comments on the  
372 significance of our work. Our responses to the comments one by one are shown as  
373 follows.

374

375 **Comment 1:** The authors modulate the PPC effect with a longer decay process by  
376 decreasing the O contents unilaterally. The authors are suggested to clarify the factors  
377 that determine the PPC effect. In addition, please make it clear in the main text, what  
378 are the detailed requirements in synapse behavior for in-sensor reservoir computing?

379 **Reply to Comment 1:** We thank the reviewer for this helpful comment.

380 There are several factors to introduce PPC effects in semiconductor materials, such as  
381 ionization of oxygen vacancy sites<sup>R10</sup>, macroscopic potential barriers<sup>R11</sup>, and metastable  
382 peroxides<sup>R12</sup>. In the previous report of photoelectronic device based on amorphous  
383 Ga<sub>2</sub>O<sub>3</sub><sup>R13</sup>, the oxygen vacancy is a relatively crucial factor to cause the PPC effect.

384 Researchers have reported many methods to modulate the PPC effect, including oxygen  
385 ambient modulation<sup>R14</sup>, post annealing<sup>R15</sup>, and Ar-plasma pretreatment<sup>R16</sup>. By utilizing  
386 these methods in the process of material growth, the PPC effect can be well controlled,

387 whether it is enhanced or vanished. In this work, we fabricated comparative samples of  
388 various O contents by ambient modulation, and validated the influence of oxygen  
389 vacancy on the PPC effect.

390 In addition, we have summed up some requirements for photo-synapse to be used in  
391 reservoir computing<sup>R2, 7</sup>:

392 a) Nonlinearity

393 The nonlinearity in the RC is mainly shown in the nonlinearity of the neurons. This  
394 setup enables the RC to cope with the nonlinear functions in real world. There have  
395 also been reports using a nonlinear dynamical system in the state updating of the RC,  
396 reaching good result in time-series processing. As for the photo-synapse, amorphous-  
397 Ga<sub>2</sub>O<sub>3</sub>-based device have inherent nonlinear photoresponse (see Supplementary Fig. 2),  
398 thus are candidates for an implementing physical RC.

399 b) Short-term memory

400 The short-term memory is a component of the echo state property, the condition for the  
401 reservoir to reach an asymptotic stability that the states of the reservoir network is  
402 determined by the input and the real-time reservoir state, thus the reservoir can show  
403 good performance in tracking and synchronizing with a time series. In the situation of  
404 the photo-synapses, we would require the devices to show decay in the photogenerated  
405 conductance after illumination. Interestingly, the PPC effect which represents the decay  
406 process of the photogenerated current, could be regarded as the STM characteristic of  
407 a synaptic device.

408 c) High dimensions/More reservoir states

409 The function of RC largely relies on the ability of dimension upgrading. In the  
410 dimension upgrading process, the input is mapped into a space of higher dimension,  
411 and linear separation is done to give prediction of the time series data points. As for  
412 optoelectronic reservoir, it usually requires that the photo-synapse can generate more  
413 states when given with any type of input optical data.

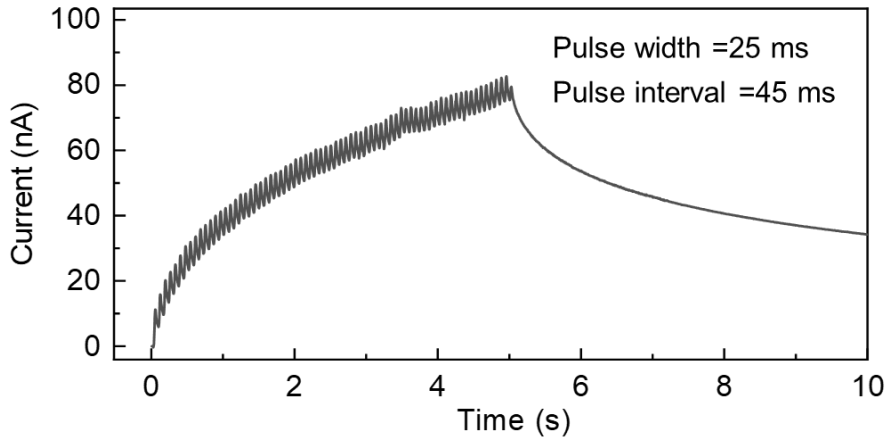

414

415 **Fig. R8 Gradual state change by conducting consecutive pulse stimulations.** With  
 416 the increasing of pulse numbers, the conductance of the reservoir rises nonlinearly,  
 417 indicating abundant reservoir states.

418

419 d) Stability

420 The stability (endurance) is an important property in implementing the RCs. It requires  
 421 that the reservoir could maintain its original properties like the decay constant, upper  
 422 and lower limits of the conductance, and so on. It is hoped that the hardware platform  
 423 can be effective and also endurable, since the RC system must be trained before they  
 424 are introduced in real-world applications.

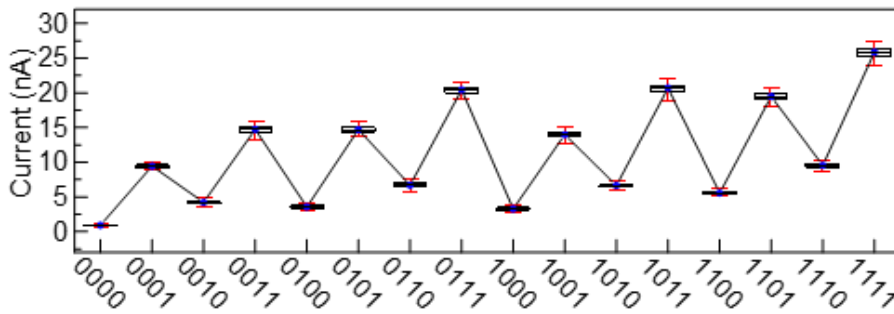

425

426 **Fig. R9 Repeatability of one typical device (Device #7 in Supplementary Fig. 7) as**  
 427 **a demonstration of endurance performance.** Each box includes 100 operations of the  
 428 same pulse inputs.

429

430 According to the reviewer's comments, we have claimed the detailed features in  
 431 synapse behavior for in-sensor reservoir computing in the revised main text

432 **(Introduction, Paragraph 2):**

433 “Fortunately, a promising strategy of in-sensor RC based on optoelectronic devices has  
434 been proposed for temporal sensory information processing and verified with the  
435 assistance of system simulation<sup>21, 22</sup>. In order to fulfill the in-sensor applications, the  
436 optoelectronic devices should be marked by the properties of nonlinearity response,  
437 short-term memory (STM), multiple states and stability. Nevertheless, the waveband  
438 utilized in above works is not suitable for DUV detection.”

439

440 **Comment 2:** The authors mentioned that “the deliberately enlarged PPC effect by Ga-  
441 rich design turns the sample S1 into an ideal photo-synapse”. But there must be  
442 something wrong in Fig. 2, where the main information about S1, S2, and S3 are  
443 missing. Even the main text and caption introduce the figures in details, Fig. 2 and  
444 Supplementary Fig. 2 have been mistakenly labelled.

445 **Reply to Comment 2:** We thank the reviewer for this helpful comment. Really sorry  
446 about the faults for Fig. 2, and Supplementary Fig. 2. We have modified the relevant  
447 figures and captions in the revised manuscript as:

448 (main text, **Fig. 2**)

449 “

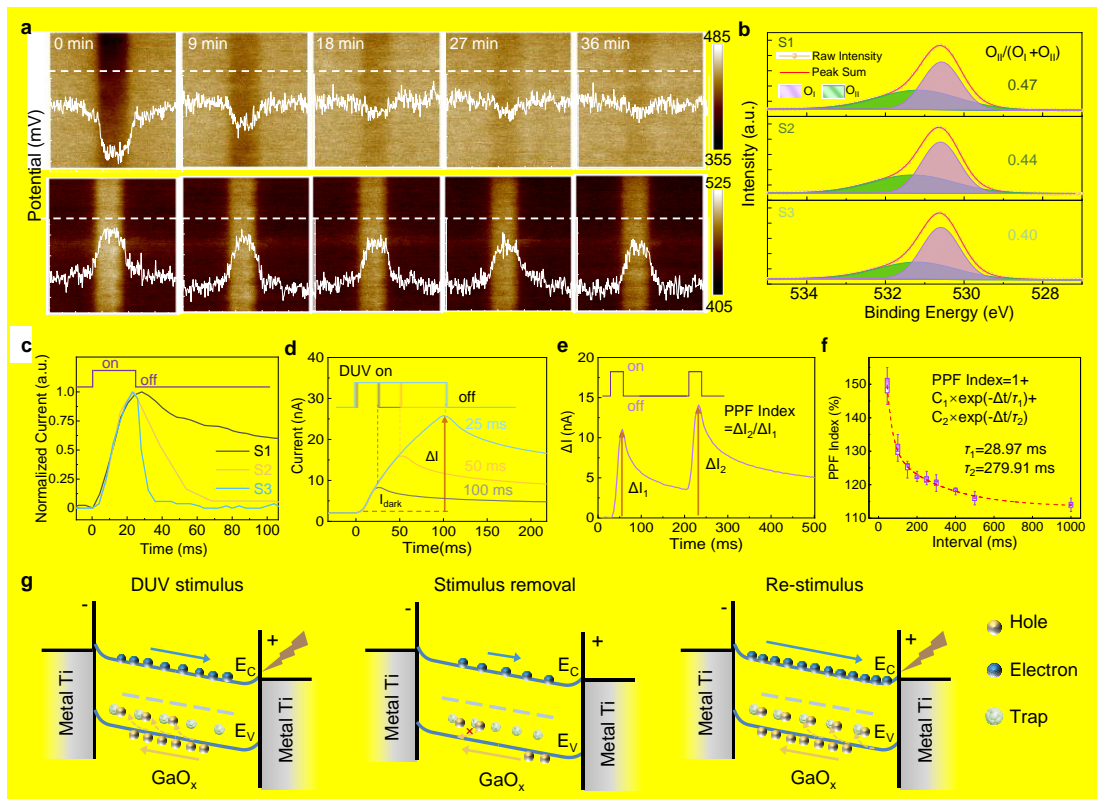

450

451 **Fig. 2 PPC effect and synaptic behavior of the a-GaO<sub>x</sub> DUV sensor.”**

452 (SI, Supplementary Fig. 2)

453 “

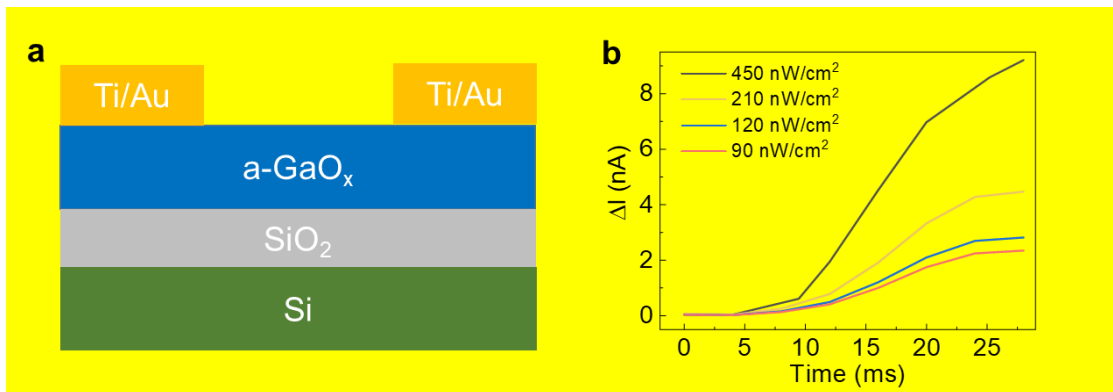

454

455 **Supplementary Fig. 2 a-GaO<sub>x</sub> device and its nonlinear photoresponse. a** Schematic  
 456 diagram of the cross-section structure of the a-GaO<sub>x</sub> device. **b** Nonlinear dependence  
 457 of  $\Delta I$  on DUV light pulse width (25 ms) under various power densities.”

458

459 **Comment 3:** The trends during input mapping in Supplementary Fig. 6 and Fig. 7 are  
 460 similar. How much will the difference in peak value influence the recognition accuracy?



461 **Reply to Comment 3:** We thank the reviewer for this helpful comment. It is found  
462 that the average value of each state shows a very similar trend, although the increment  
463 of SD and ST causes the decline of average SMP1 (Supplementary Fig. 6). According  
464 to the suggestions of the reviewer, to clarify the influence of peak value of SMP1 on  
465 the recognition accuracy, additional training simulations of four sampling conditions  
466 have been conducted by the same dual-feature strategy, as shown in Fig. R10. The  
467 convergency trends of recognition accuracy are similar, which indicates that the  
468 sampling conditions have a negligible influence on the recognition simulation results.  
469 The possible reason is that the short-term memory of the device is a gradual process,  
470 and the sampled analog values increase or decrease synchronously. Besides, the readout  
471 network contains only one matrix to multiple with the reservoir analog values and  
472 utilizes the Softmax function to generate final outputs, diluting the differences in the  
473 SMP1 absolute values. These comparison results demonstrate that the photo-synapse  
474 reservoir could benefit from an elastic read time (sampling condition) of the analog  
475 current.

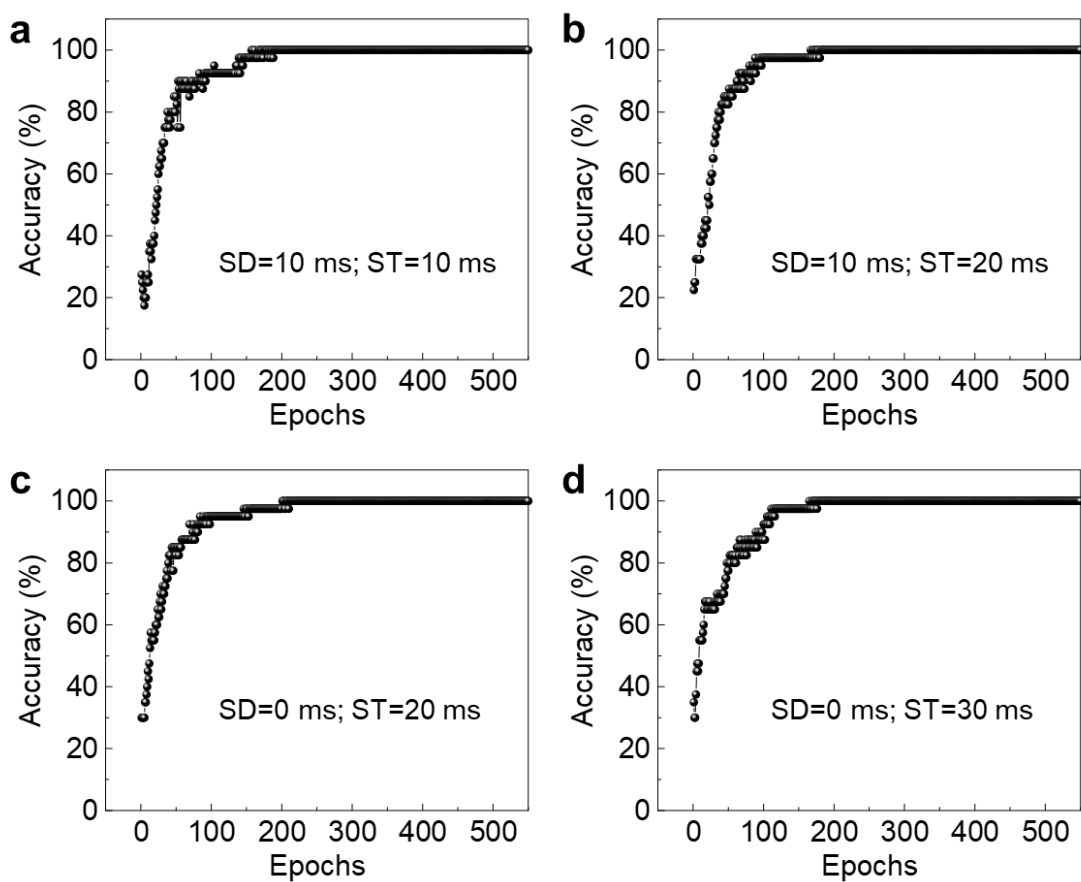

476

477 **Fig. R10 Accuracy convergence curves of the training process with different SD**

478 **and ST sampling conditions. a** SD=10 ms, ST=10 ms; **b** SD=20 ms, ST=20 ms; **c**  
479 ST=0 ms, ST=20 ms; **d** SD=0 ms, ST=30 ms. Even a large SMP1 range indicates a high  
480 recognition capability, the trends of accuracy convergency under different sampling  
481 conditions are similar. The possible reason is that the Softmax function dilutes the  
482 differences in the SMP1 absolute values.

483

484 **Comment 4:** The dual-feature strategy sharps the feature of various inputs and  
485 improves the recognition accuracy. But it also increases the burden of the readout layer.  
486 Can the authors comment this effect on the overall performance?

487 **Reply to Comment 4:** We thank the reviewer for his/her approval that the dual-feature  
488 strategy sharps the feature of various inputs and improves the recognition accuracy with  
489 respect to the single-feature strategy. About the increment of the burden of the readout  
490 layer, it is a typical dilemma between the system recognition accuracy and the hardware  
491 consumption. Obviously, the dual-feature strategy system increases the hardware  
492 burden of the RC system. This topic of the dilemma between system recognition rate  
493 and hardware burden deserves further study.

494 From the perspective of high recognition accuracy, increment in hardware burden to a  
495 certain extent is acceptable. The typical two-terminal structure of memristor is highly  
496 CMOS compatible and ensures its unparalleled advantage in high density integration.  
497 Memristor chips in the scales beyond Mb have already been broadly reported<sup>R17, 18</sup>.  
498 Therefore, even only a 32×32 memristor array is utilized in this work, large array will  
499 support the dual-feature strategy to facilitate a high recognition accuracy. At the same  
500 time, with the development of energy-efficient memristor array, the whole system  
501 would perform a lower power consumption.

502 In addition, optimization of the reservoir in the single-feature strategy could be another  
503 scheme to alleviate the dilemma. The low training speed in the single-feature strategy  
504 is mainly caused by the overlaps between the feature value distributions. Therefore,  
505 optimization of the reservoir architecture to sharpen the feature value distribution will  
506 also improve the final training result, making it comparable to the dual-feature strategy.

507

508 **Comment 5:** In Supplementary Fig. 11, pulse stimulations for increment and decrement

509 of memristor conductance are missing. Also, the description of the training method of  
 510 the memristor array is unclear in method section. The authors should make it more clear.

511 **Reply to Comment 5:** We thank the reviewer for this helpful comment.

512 We have modified the relevant figures and captions about the memristor array  
 513 operations and characteristics in the revised manuscript:

514 (main text, Fig. 4a)

515 “

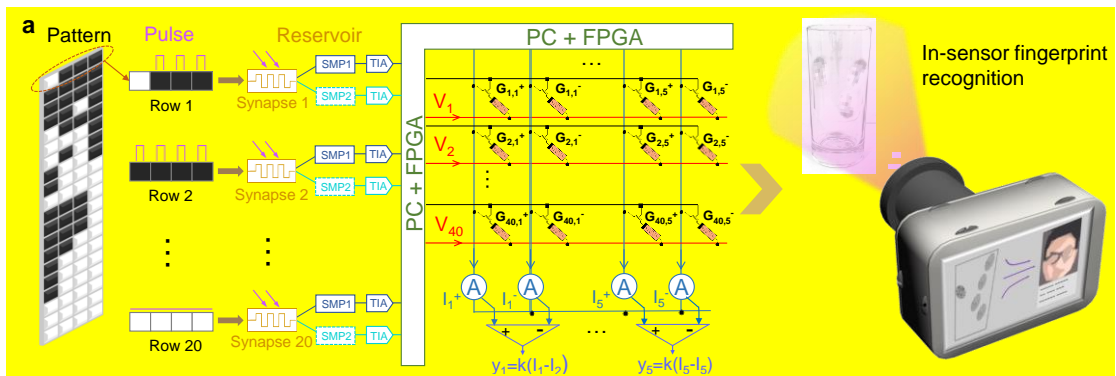

516

517 ”

518 (SI, Revised Supplementary Fig. 12)

519 “

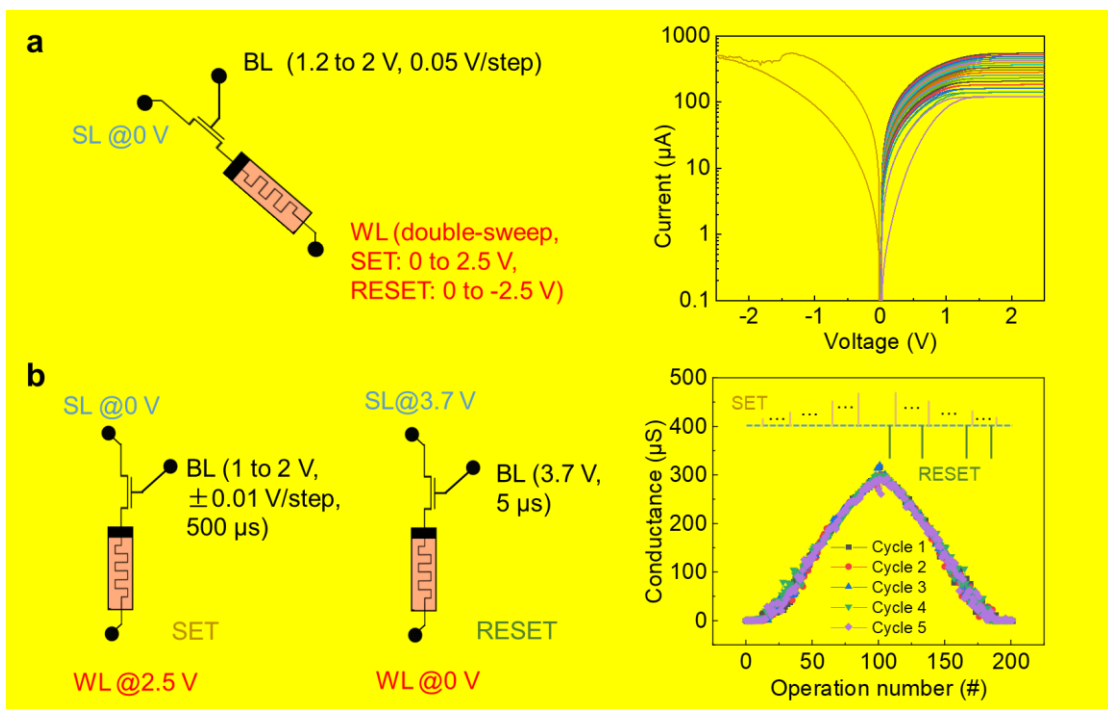

520

521 **Supplementary Fig. 12 Basic operations and resistance/conductance**  
522 **characteristics of the memristor in the array. a** Operation parameters (left) and the  
523 I-V characteristics (right) under DC double sweep mode of one typical memristor.  
524 When the source line (SL) is grounded and the bit line (BL) is fixed at a certain voltage,  
525 the DC voltage on the word line (WL) conducts double-sweep from 0 to 2.5 V to SET  
526 and 0 to -2.5 V to RESET. The resistance state can be well modulated by different  
527 compliance currents determined by the bias of BL. **b** Operation parameters of the pulse  
528 SET (left) and pulse RESET (middle) and the gradual conductance modulation for 5  
529 cycles under successive stimulations (right) of one typical memristor. In the  
530 conductivity rising stage, only the pulse SET operations are implemented, in which the  
531 bit line voltage increases from 1 to 2 V with a step of 0.01 V. While in the conductivity  
532 decline stage, each conductance state is modulated by a couple of pulse RESET and  
533 pulse SET: first, a RESET operation is conducted to erase the conductance; then, a pulse  
534 SET is applied, in which the bit line voltage decreases from 2 to 1 V with a step of -  
535 0.01 V. The conductance value could be repeatedly regulated within approximately  
536 0-300  $\mu\text{S}$ .”

537

538 For the training of the memristor array, we utilized offline training method to update  
539 the weights (conductance) matrix of the array. Once the software simulation was  
540 completed, the weights of the whole array (400 memristor devices) were updated  
541 referring to the simulation results, column by column. The operation parameters are  
542 illustrated in the revised Supplementary Fig. 12.

543

544 According to the reviewer’s comments, we have added the more detailed memristor  
545 modulation and training methods into the revised main text (**Methods, Network**  
546 **training**):

547 “Each differential pair in the memristor array represents a single weight of the neural  
548 network. Transistors are used for device addressing and crosstalk current suppression.  
549 As for the training of the memristor array, we utilized an offline training method to  
550 update the weight (conductance) matrix of the array. Once the software simulation is  
551 completed, the weights of the whole array (400 memristor devices) are updated by  
552 referring to the simulation results, column by column. To SET a selected column, all

553 source lines (in blue, in Fig. 4a) were floated, except the selected one, which was  
554 grounded. All word lines (in red) were biased at the same SET voltages.”

555

556 **Comment 6:** “differentcomplicance” in Supplementary Fig. 9 should be “different  
557 compliance”. Please check the English throughout the manuscript.

558 **Reply to Comment 6:** We thank the reviewer for this helpful comment. This typo has  
559 been corrected. According to the reviewer’s comments, the English expression of the  
560 full text has been checked and polished. All the revisions about typos and grammar in  
561 the revised main text and SI are highlighted in yellow.

562

## 563 **References**

- 564 R1. Zhong, Y. et al. Dynamic memristor-based reservoir computing for high-efficiency temporal  
565 signal processing. *Nat. Commun.* **12**, 408 (2021).
- 566 R2. Milano, G. et al. In materia reservoir computing with a fully memristive architecture based on  
567 self-organizing nanowire networks. *Nat. Mater.* **121**, 195–202 (2021).
- 568 R3. Moon, J. et al. Temporal data classification and forecasting using a memristor-based reservoir  
569 computing system. *Nat. Electron.* **2**, 480-487 (2019).
- 570 R4. Appeltant, L. et al. Information processing using a single dynamical node as complex system. *Nat.*  
571 *Commun.* **2**, 468 (2011).
- 572 R5. Midya, R. et al. Reservoir computing using diffusive memristors. *Adv. Intell. Syst.* **1**, 1900084  
573 (2019).
- 574 R6. Sun, L. et al. In-sensor reservoir computing for language learning via two-dimensional memristors.  
575 *Sci. Adv.* **7**, eabg1455 (2021).
- 576 R7. Du, C. et al. Reservoir computing using dynamic memristors for temporal information processing.  
577 *Nat. Commun.* **8**, 2204 (2017).
- 578 R8. Wang, Y. et al. MXene-ZnO memristor for multimodal in-sensor computing. *Adv. Funct. Mater.*  
579 **31**, 2100144 (2021).
- 580 R9. Du, W. et al. An optoelectronic reservoir computing for temporal information processing. *IEEE*  
581 *Electron Device Lett.* **43**, 406 (2022).
- 582 R10. Liang, H. et al. Flexible X-ray detectors based on amorphous Ga<sub>2</sub>O<sub>3</sub> thin films. *ACS Photonics* **6**,  
583 351-359 (2018).
- 584 R11. Antonello Tebano et al. Room-temperature giant persistent photoconductivity in SrTiO<sub>3</sub>/LaAlO<sub>3</sub>  
585 heterostructures. *ACS Nano* **6**, 1278-1283 (2012).
- 586 R12. Jang, J. T. et al. Study on the photoresponse of amorphous In-Ga-Zn-O and zinc oxynitride  
587 semiconductor devices by the extraction of sub-gap-state distribution and device simulation. *ACS*

588 *Appl. Mater. Interfaces* **7**, 15570-15577 (2015).

589 R13. Cui, S. et al. Room-temperature fabricated amorphous Ga<sub>2</sub>O<sub>3</sub> high-response-speed solar-blind  
590 photodetector on rigid and flexible substrates. *Adv. Opt. Mater.* **5**, 1700454 (2017).

591 R14. Chen, K.-Y. et al. The effect of oxygen vacancy concentration on indium gallium oxide solar  
592 blind photodetector. *IEEE Trans. Electron Devices* **65**, 1817-1822 (2018).

593 R15. Feng, Z. et al. Influence of annealing atmosphere on the performance of a β-Ga<sub>2</sub>O<sub>3</sub> thin film and  
594 photodetector. *Opt. Mater. Express* **8**, (2018).

595 R16. Qian, L. X. et al. Simultaneously improved sensitivity and response speed of β-Ga<sub>2</sub>O<sub>3</sub> solar-blind  
596 photodetector via localized tuning of oxygen deficiency. *Appl. Phys. Lett.* **114**, (2019).

597 R17. Cheng-Xin Xue et al. A 1Mb multibit reRAM computing-in-memory macro with 14.6ns parallel  
598 MAC computing time for CNN Based AI edge processors. *2019 IEEE International Solid-State  
599 Circuits Conference*, (San Francisco, 2019).

600 R18. Pulkit Jain, U. A. et al. A 3.6Mb 10.1Mb/mm<sup>2</sup> embedded non-volatile reRAM macro in 22nm  
601 FinFET technology with adaptive Forming/Set/Reset schemes yielding down to 0.5V with  
602 sensing time of 5ns at 0.7V. *2019 IEEE International Solid-State Circuits Conference*, (San  
603 Francisco, 2019).

604  
605  
606  
607  
608  
609  
610  
611  
612  
613  
614  
615  
616  
617  
618  
619  
620  
621

622 **The list of the corrections of NCOMMS-22-15956:**

623 After carefully considering the reviewers' valuable comments/suggestions, we revised  
624 the manuscript in detail. All the revised text, data, and notes in the manuscript are  
625 highlighted in yellow. The list of the corrections is recorded as follows **by the order**  
626 **of occurrence** in the revised manuscript:

| Former Version                                                                                                                                                                                                                                                                                                                                                                      | Revised Version                                                                                                                                                                                                                                                                                                                                                                                                                                                                                                                                                                                |
|-------------------------------------------------------------------------------------------------------------------------------------------------------------------------------------------------------------------------------------------------------------------------------------------------------------------------------------------------------------------------------------|------------------------------------------------------------------------------------------------------------------------------------------------------------------------------------------------------------------------------------------------------------------------------------------------------------------------------------------------------------------------------------------------------------------------------------------------------------------------------------------------------------------------------------------------------------------------------------------------|
| <p><b>(Title)</b></p> <p>In-sensor reservoir computing system for in-situ latent fingerprint recognition with deep ultraviolet photo-synapses and memristor array</p>                                                                                                                                                                                                               | <p><b>(Title)</b></p> <p>In-sensor reservoir computing system <b>for latent</b> fingerprint recognition with deep ultraviolet photo-synapses and memristor array</p>                                                                                                                                                                                                                                                                                                                                                                                                                           |
| <p><b>(main text, Introduction, Paragraph 2)</b></p> <p>Fortunately, a promising strategy of in-sensor RC computing based on optoelectronic devices has been proposed for temporal sensory information processing and verified with the assistance of system simulation<sup>21, 22</sup>. Nevertheless, the waveband utilized in these works is not suitable for DUV detection.</p> | <p><b>(main text, Introduction, Paragraph 2)</b></p> <p>Fortunately, a promising strategy of in-sensor <b>RC based</b> on optoelectronic devices has been proposed for temporal sensory information processing and verified with the assistance of system simulation<sup>21, 22</sup>. <b>In order to fulfill the in-sensor applications, the optoelectronic devices should be marked by the properties of nonlinearity response, short-term memory (STM), multiple states and stability.</b> Nevertheless, the waveband utilized in <b>above</b> works is not suitable for DUV detection.</p> |
| <p><b>(main text, Fig. 2)</b></p> 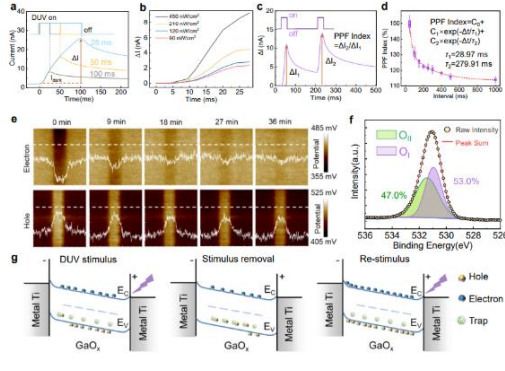 <p><b>Fig. 2 PPC effect and synaptic behavior of the a-GaO<sub>x</sub> DUV sensor.</b></p>                                                                                                                                                                    | <p><b>(main text, Fig. 2)</b></p>  <p><b>Fig. 2 PPC effect and synaptic behavior of the a-GaO<sub>x</sub> DUV sensor.</b></p>                                                                                                                                                                                                                                                                                                                                                                              |
| <p><b>(main text, Nonlinear mapping of 4-bit inputs of the a-GaOx DUV reservoir, Paragraph 2)</b></p>                                                                                                                                                                                                                                                                               | <p><b>(main text, Nonlinear mapping of 4-bit inputs of the a-GaOx DUV reservoir, Paragraph 2)</b></p>                                                                                                                                                                                                                                                                                                                                                                                                                                                                                          |

|                                                                                                                                                                                                                                                                                                                                                                                                    |                                                                                                                                                                                                                                                                                                                                                                                                                                                                                                                                                                                                                                                                                           |
|----------------------------------------------------------------------------------------------------------------------------------------------------------------------------------------------------------------------------------------------------------------------------------------------------------------------------------------------------------------------------------------------------|-------------------------------------------------------------------------------------------------------------------------------------------------------------------------------------------------------------------------------------------------------------------------------------------------------------------------------------------------------------------------------------------------------------------------------------------------------------------------------------------------------------------------------------------------------------------------------------------------------------------------------------------------------------------------------------------|
| <p>For illustrating the feature sampling, the I-t curves of three representative inputs of “0001” (in blue), “0011” (in red), and “1101” (in purple) of the a-GaOx reservoir are exhibited in Fig. 3b. Based on the conspicuous difference, each pixel sequence can be distinguished by current sampling to realize feature extraction.</p>                                                        | <p>To illustrate the feature sampling, the I-t curves of three representative inputs of “0001” (in blue), “0011” (in red), and “1101” (in purple) of the a-GaOx reservoir are exhibited in Fig. 3b. Although the last pulses are all “1”, their decay processes after the input sequences are different. Therefore, the final state of the reservoir not only relates to the last input, but also depends on its real-time state, indicating the lateral connections in such an a-GaOx reservoir<sup>21,22</sup>. Based on the conspicuous difference, each pixel sequence can be featured by current sampling to realize feature extraction.</p>                                         |
| <p><b>(main text, Nonlinear mapping of 4-bit inputs of the a-GaOx DUV reservoir, Paragraph 3)</b></p> <p>Consequently, the feature space based on nonlinear photoresponse configures the classification process of the reservoir, reducing the dimensionality of raw data from 4-bit digital inputs to 2 analog outputs that serve as the inputs of the linear readout layer<sup>49, 50</sup>.</p> | <p><b>(main text, Nonlinear mapping of 4-bit inputs of the a-GaOx DUV reservoir, Paragraph 3)</b></p> <p>Consequently, the feature space based on nonlinear photoresponse configures the classification process of the reservoir, reducing the dimensionality of raw data from 4-bit digital inputs to 2 analog outputs that serve as the inputs of the linear readout layer<sup>49, 50</sup>. The energy consumption per pulse operation of the optoelectronic reservoir can be estimated to be <math>E=20 \text{ nA} \times 1 \text{ V} \times 25 \text{ ms}=0.5 \text{ nJ}</math>, indicating that the reservoir architecture possesses potential energy-efficient characteristic.</p> |
| <p><b>(main text, Fingerprint recognition with fully-hardware DUV in-sensor RC system, Paragraph 1)</b></p> <p>Thus, a dual-feature strategy is employed, and only a dimensionality-reduced <math>40 \times 5</math> weight matrix needs to be trained for each fingerprint image.</p>                                                                                                             | <p><b>(main text, Fingerprint recognition with fully-hardware DUV in-sensor RC system, Paragraph 1)</b></p> <p>Thus, a dual-feature strategy is employed, and only a dimensionality-reduced <math>40 \times 5</math> weight matrix needs to be trained for each fingerprint image. As an example, a recognition accuracy for unseen fingerprint images has been simulated to be around 92% based on this dual-feature strategy, where the expanded sample amounts of the fingerprint images ensure the high recognition accuracy (see Supplementary Fig. 11).</p>                                                                                                                         |



|                                                                                                                                                                                                                                                                                                                                                                                                                                                                                                                                                                                                                                                                                                                                                                                                                                                                                         |                                                                                                                                                                                                                                                                                                                                                                                                                                                                                                                                                                                                                                                                                                                                                                                                                                                                                                                                                                                                                                                                         |
|-----------------------------------------------------------------------------------------------------------------------------------------------------------------------------------------------------------------------------------------------------------------------------------------------------------------------------------------------------------------------------------------------------------------------------------------------------------------------------------------------------------------------------------------------------------------------------------------------------------------------------------------------------------------------------------------------------------------------------------------------------------------------------------------------------------------------------------------------------------------------------------------|-------------------------------------------------------------------------------------------------------------------------------------------------------------------------------------------------------------------------------------------------------------------------------------------------------------------------------------------------------------------------------------------------------------------------------------------------------------------------------------------------------------------------------------------------------------------------------------------------------------------------------------------------------------------------------------------------------------------------------------------------------------------------------------------------------------------------------------------------------------------------------------------------------------------------------------------------------------------------------------------------------------------------------------------------------------------------|
| <p><b>(main text, Fingerprint recognition with fully-hardware DUV in-sensor RC system, Paragraph 3)</b></p> <p>Three situations, full-precision (double-precision floating-point) simulation, limited-precision (32-bit fixed-point quantization) simulation, and hardware experiment, are considered for comparison. As shown in Fig. 4f, even recognition accuracies in all situations deteriorate with the increment of noise level, the recognition accuracy of hardware experiment still maintains above 90% under 15% noise level. Therefore, the fully-hardware DUV in-sensor RC system based on a-GaOx photo-synapse has promising potential to be competent for high-precision in-situ DUV fingerprint recognition tasks. It should be noted that the increase of resistive states of the memristor device could significantly improve the system robustness<sup>51</sup>.</p> | <p><b>(main text, Fingerprint recognition with fully-hardware DUV in-sensor RC system, Paragraph 3)</b></p> <p>Three situations, full-precision (double-precision floating-point) simulation, limited-precision (32-bit fixed-point quantization) simulation, and hardware experiment, are considered for comparison. As shown in Fig. 4f, recognition accuracies in all situations remain comparable under <math>\leq 3\%</math> noise level and deteriorate asynchronously with its increment. The limited resistive states of the memristor device and the amplification of non-ideal factors (e.g., device-to-device and cycle-to-cycle variations, discreteness of operations, etc.) under high-level noise dominate the relatively quick deterioration in the hardware situation. Therefore, the improvement of resistive states and uniformity of the memristor devices could further improve the system robustness<sup>51</sup>. It is noteworthy that the recognition accuracy of the hardware experiment still maintains above 90% under 15% noise level.</p> |
| <p><b>(main text, Methods, Basic memristor array operations)</b></p> <p>Transistors are used for device addressing and crosstalk current suppression. For weight programming, the memristor array was programmed column by column. To SET a selected column, all source lines (in blue, in Fig. 4a) were floated, except the selected one, which was grounded.</p>                                                                                                                                                                                                                                                                                                                                                                                                                                                                                                                      | <p><b>(main text, Methods, Basic memristor array operations)</b></p> <p>Transistors are used for device addressing and crosstalk current suppression. As for the training of the memristor array, we utilized an offline training method to update the weight (conductance) matrix of the array. Once the software simulation is completed, the weights of the whole array (400 memristor devices) are updated by referring to the simulation results, column by column. To SET a selected column, all source lines (in blue, in Fig. 4a) were floated, except the selected one, which was grounded.</p>                                                                                                                                                                                                                                                                                                                                                                                                                                                                |
| <p><b>(main text, Methods, Network training)</b></p>                                                                                                                                                                                                                                                                                                                                                                                                                                                                                                                                                                                                                                                                                                                                                                                                                                    | <p><b>(main text, Methods, Network training)</b></p>                                                                                                                                                                                                                                                                                                                                                                                                                                                                                                                                                                                                                                                                                                                                                                                                                                                                                                                                                                                                                    |

The fully-connected network was trained by MATLAB Deep-learning Toolbox, with softmax activation function and back-propagation algorithm.

The fully-connected network was trained by the MATLAB Deep-learning Toolbox, utilizing the Softmax output function and the logistic regression to supervise the learning.

(SI, Supplementary Fig. 2)

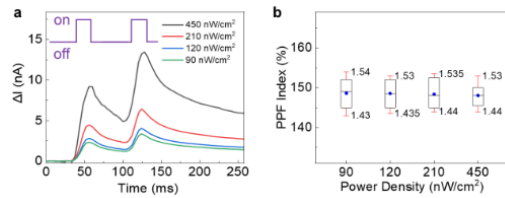

**Supplementary Fig. 2 a-GaO<sub>x</sub> device and its nonlinear photoresponse.** **a** Schematic diagram of the cross-section structure of the a-GaO<sub>x</sub> device. **b** Nonlinear dependence of ΔI on DUV light pulse width (25 ms) under various power densities.

(SI, Supplementary Fig. 2)

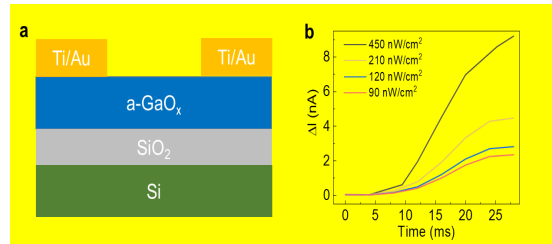

**Supplementary Fig. 2 a-GaO<sub>x</sub> device and its nonlinear photoresponse.** **a** Schematic diagram of the cross-section structure of the a-GaO<sub>x</sub> device. **b** Nonlinear dependence of ΔI on DUV light pulse width (25 ms) under various power densities.

(SI, Supplementary Fig. 7)

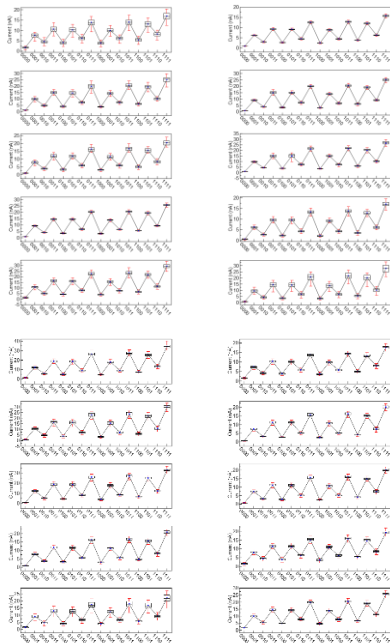

**Supplementary Fig. 7 Statistic data of SMP1 of the 16 inputs from stochastically selected 20 a-GaO<sub>x</sub> photo-synapse devices.** The sampling parameters are fixed at SD=0 ms and ST=10 ms. A similar distribution trend indicates that all devices

(SI, Supplementary Fig. 7)

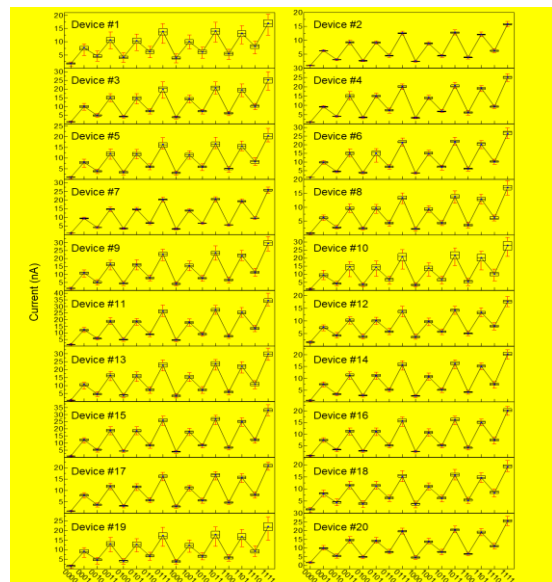

**Supplementary Fig. 7 Statistic data of SMP1 of the 16 inputs from stochastically selected 20 a-GaO<sub>x</sub> photo-synapse devices.** The sampling parameters are fixed at SD=0 ms and ST=10 ms. A similar distribution trend indicates that all devices

sampling parameters are fixed at  $SD=0$  ms and  $ST=10$  ms. A similar distribution trend indicates that all devices exhibit decent classification performances.

exhibit decent classification performances.

None

(SI, Supplementary Fig. 8)

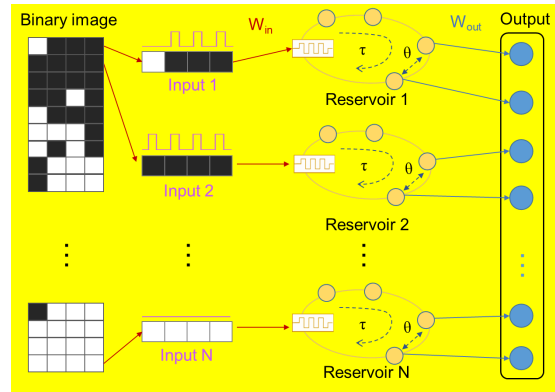

**Supplementary Fig. 8 Schematic diagram of the parallel time-delayed reservoir network as a demonstration of our work.** The image is divided suitably then input into the reservoirs in parallel. The virtual nodes of each reservoir are coupled with a time interval  $\theta$ . For the designed readout network, only the last 1 or 2 nodes of each reservoir are utilized to construct the output vector.

None

(SI, Supplementary Fig. 11)

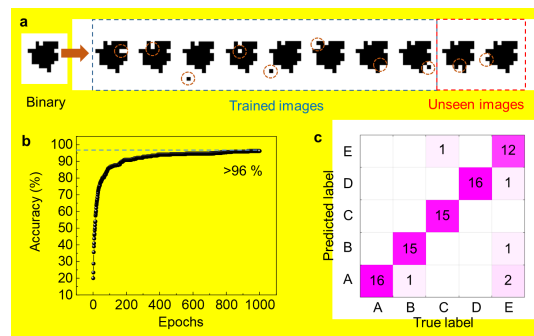

**Supplementary Fig. 11 Recognition simulation of the unseen fingerprint images.** a Expansion of the data set of the fingerprints from 40 to 400 images by introducing one random noise pixel in each

original image for 10 times (taking the C-1 image in Supplementary Fig. 10 as an example), owing to the finite scale of the FVC 2002 database. 80% of the fingerprint images were set as the training set and the other 20% as the test set (namely the unseen images). **b** Accuracy convergency of the training process within 1000 epochs. Considerable recognition accuracy can be achieved upon certain training epochs. **c** Confusion matrix of the fingerprint recognition with the unseen images as the test set. The test accuracy is extracted to be 92.5%.

(SI, Supplementary Fig. 10 and 11)

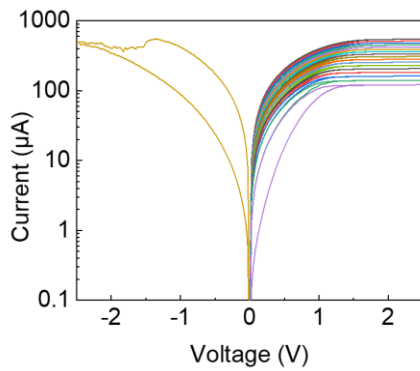

**Supplementary Fig. 10 I-V characteristics of SET and RESET characteristics of one typical memristor in the array.** The resistance state can be well modulated by different compliance current.

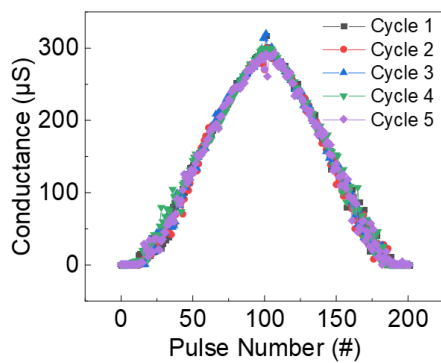

**Supplementary Fig. 11 Gradual**

(SI, Supplementary Fig. 12)

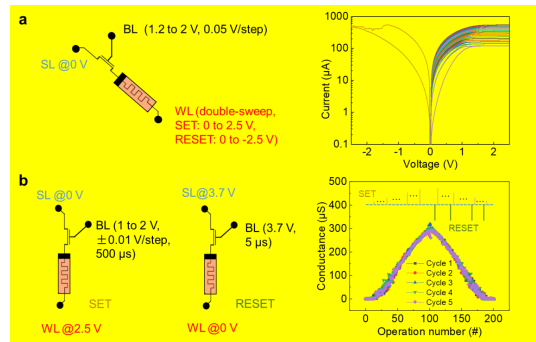

**Supplementary Fig. 12 Basic operations and resistance/conductance characteristics of the memristor in the array.** **a** Operation parameters (left) and the I-V characteristics (right) under DC double sweep mode of one typical memristor. When the source line (SL) is grounded and the bit line (BL) is fixed at a certain voltage, the DC voltage on the word line (WL) conducts double-sweep from 0 to 2.5 V to SET and 0 to -2.5 V to RESET. The resistance state can be well modulated by different compliance currents determined by the bias of BL. **b** Operation parameters of the pulse SET (left) and pulse RESET (middle) and the gradual conductance modulation for 5 cycles under successive stimulations (right) of one typical memristor. In the conductivity rising stage, only the pulse SET

|                                                                                                                                    |                                                                                                                                                                                                                                                                                                                                                                                                                                                                                                                      |
|------------------------------------------------------------------------------------------------------------------------------------|----------------------------------------------------------------------------------------------------------------------------------------------------------------------------------------------------------------------------------------------------------------------------------------------------------------------------------------------------------------------------------------------------------------------------------------------------------------------------------------------------------------------|
| <p><b>conductance modulation for 5 cycles under successive pulse stimulations based on one typical memristor in the array.</b></p> | <p>operations are implemented, in which the bit line voltage increases from 1 to 2 V with a step of 0.01 V. While in the conductivity decline stage, each conductance state is modulated by a couple of pulse RESET and pulse SET: first, a RESET operation is conducted to erase the conductance; then, a pulse SET is applied, in which the bit line voltage decreases from 2 to 1 V with a step of -0.01 V. The conductance value could be repeatedly regulated within approximately 0-300 <math>\mu</math>S.</p> |
|------------------------------------------------------------------------------------------------------------------------------------|----------------------------------------------------------------------------------------------------------------------------------------------------------------------------------------------------------------------------------------------------------------------------------------------------------------------------------------------------------------------------------------------------------------------------------------------------------------------------------------------------------------------|

627

628

## REVIEWER COMMENTS

Reviewer #1 (Remarks to the Author):

The authors have rigorously addressed all the feedback provided by the reviewers.

I would urge that authors address this one part clearly:

If there is excellent yield for the memristive crossbar, why AMP task results are achieved via simulation? or in other words,

based on the response, the memristor-based RC network requires optimization of read-out circuit, ADC, control unit, etc.

It is unclear if these parts of the system are on silicon or not. Further, it is important to note how would the system performance change if one considered the ADC error and overhead of peripherals.

Reviewer #2 (Remarks to the Author):

The authors have made satisfactory revisions according to the reviewers' suggestions. I would recommend it to be published in its present form. Regarding the latest progress on in-sensor computing, the authors may refer to *Advanced Materials*, 2022, 2203830.

## Response to Reviewer's Comments

This Response Letter is regarding a former manuscript submitted to *Nature Communications*, entitled “*In-sensor reservoir computing system for latent fingerprint recognition with deep ultraviolet photo-synapses and memristor array*” by Zhongfang Zhang et al. (NCOMMS-22-15956A). We would like to express our special thanks for the affirmation from the reviewers about the revised version of this work. In the following response, the original comments are in black font, our responses are in blue font, and changes in the revised main text are highlighted in yellow.

### **I. Comments from Reviewer 1**

#### **Overall Comment:**

The authors have rigorously addressed all the feedback provided by the reviewers.

I would urge that authors address this one part clearly:

If there is excellent yield for the memristive crossbar, why AMP task results are achieved via simulation? Or in other words, based on the response, the memristor-based RC network requires optimization of read-out circuit, ADC, control unit, etc.

It is unclear if these parts of the system are on silicon or not. Further, it is important to note how would the system performance change if one considered the ADC error and overhead of peripherals.

**Reply to Comment:** We thank the referee for the precious time and constructive comments on our manuscript.

We guess the reviewer means that the AMP task of memristor array readout is simulated. In our work, the peripheral circuits were integrated on a printed circuit board, including ADC, TIA, and control unit, as shown in Fig. R1.

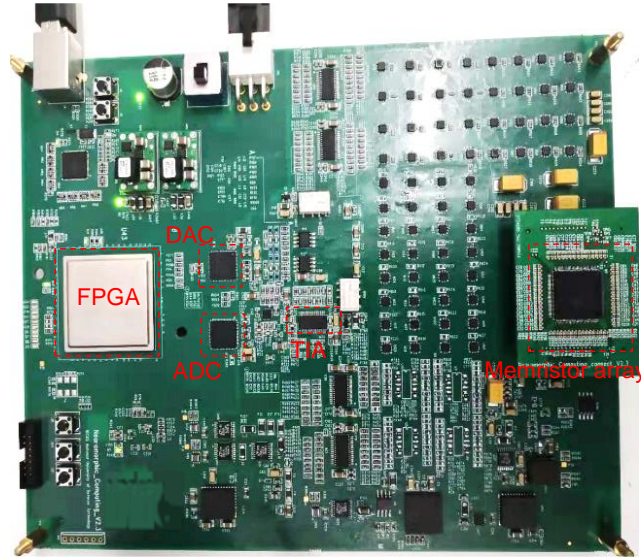

**Fig. R1** The integrated control units and peripheral circuits on the test board.

The memristor array size is  $32 \times 32$ , which is not adapted to directly construct a network with 40 inputs. Thus, a block processing method is utilized on the readout array: the  $40 \times 10$  network is divided into  $30 \times 10$  and  $10 \times 10$  parts and assigned separately in the array, and then the currents of each two correlated columns are manually added for further processing by a computer (utilizing Softmax function via simulation). It should be noted that increasing the size of the array will make the readout of the network with only one operation. Even so, the simulation only exists in training process, and the inference is based on hardware data. In Fig. 4d and Fig. 4e, the actual conductance values of the memristor hardware were multiplied by a constant ( $1.25 \times 10^4$ ), to make the hardware and simulation results share the same color bar for better comparison. This does not mean that the AMP in the readout process relies on simulation. To avoid conflict, we added descriptions about the multiplication constant in the caption of Figure 4d:

“

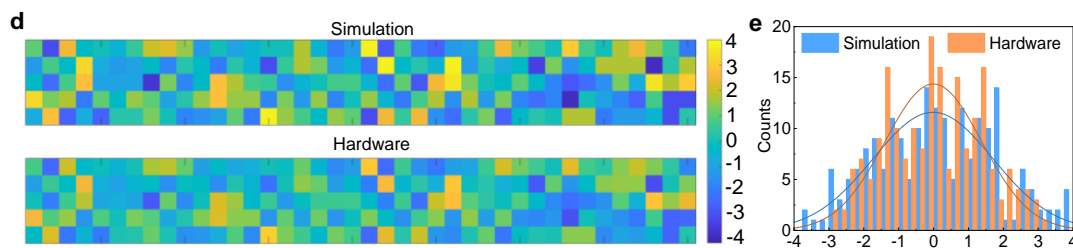

**Fig. 4** Fingerprint recognition based on hardware DUV in-sensor RC system. **d** The colormaps and **e** statistic histograms of the  $40 \times 5$  weights of the simulation and



hardware experiment, respectively. The actual conductance values read from hardware were multiplied by a constant of  $1.25 \times 10^4$  for better comparison with the simulated weights.”

The read-out circuit, ADC, control unit, *etc.*, are based on silicon. We thank the reviewer for the constructive suggestion to achieve a compact integration of the whole in-sensor computing system. Both the photo-synapse devices and peripherals deserve further optimization in our future work.

There are already mature techniques of ADC and peripherals parts to meet the requirements of commercialized applications. By conducting quantization of the input and output values of the memristor array, we have conducted simulations of the influences of ADC precisions on the inference results, as shown in Fig. R2. As long as there are no significant errors during multiple operation cycles, the performance will be well preserved even when the ADC precision is down to 8 bits. Compared to the errors of photo-synapse and memristor (*e.g.*, device-to-device and cycle-to-cycle variations, *etc.*), the circuit parts have relatively little impact on the performance in this in-sensor RC system.

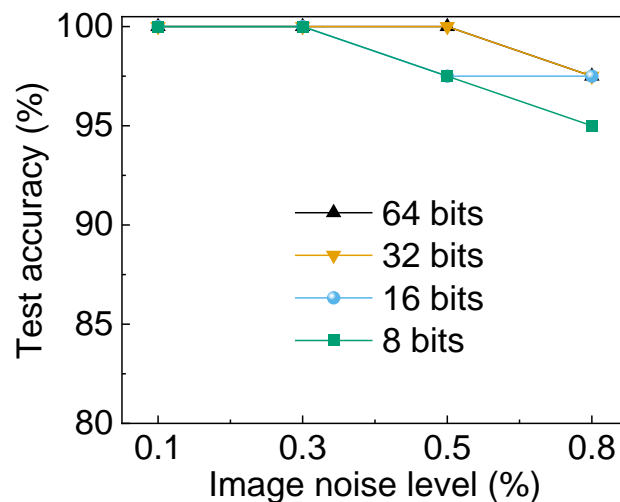

**Fig. R2** The influence of ADC precision on test accuracy with increasing image noise level. Quantization from 8 bits to 64 bits of the input and output values of the memristor array simulated the ADC precision. The influence of ADC precision on the recognition results is far inferior to that of image noise.

In addition, the peripheral overhead mainly comes from ADC, which means that the lower precision of ADC can reduce the hardware overhead, indicating a typical trade-

off in system construction. It has been proven that the ADC precision reduction does not seriously affect the system performance in this work, therefore it is better to use low-precision ADC to construct the system. But if the accuracy requirement is very tough, using low-precision ADC may deteriorate the performance, which means that the accuracy and overhead need to be considered comprehensively.

## **II. Comments from Reviewer 2**

### **Overall Comment:**

The authors have made satisfactory revisions according to the reviewers' suggestions. I would recommend it to be published in its present form. Regarding the latest progress on in-sensor computing, the authors may refer to *Advanced Materials*, 2022, 2203830.

**Reply to Comment:** We thank the referee for the precious time and positive comments on our manuscript. The suggested paper has been added into the corresponding location and the number of the references is updated accordingly in the revised manuscript:

(main text, **Introduction, Paragraph 1**)

“In addition, these systems utilize additional optical filters for charge-coupled devices (CCDs) and complementary metal-oxide-semiconductor (CMOS) image sensors, increasing the complexity of the entire system for latent fingerprint identification<sup>15-17</sup>.”

**(References)**

“17. Wan, T. et al. In-sensor computing: materials, devices, and integration technologies. *Adv. Mater.* **2022**, e2203830 (2022).”

## REVIEWERS' COMMENTS

Reviewer #1 (Remarks to the Author):

The authors have updated the manuscript with the suggestions provided. The manuscript can be accepted for publication.

Manuscript ID: NCOMMS-22-15956B

### **Response to Reviewer's Comments**

This Response Letter is regarding a former manuscript submitted to *Nature Communications*, entitled “*In-sensor reservoir computing system for latent fingerprint recognition with deep ultraviolet photo-synapses and memristor array*” by Zhongfang Zhang *et al.* (NCOMMS-22-15956B). We would like to express our special thanks for the affirmation from the editor and reviewers about the revised version of this work.

#### **Comments from Reviewer 1**

##### **Overall Comment:**

The authors have updated the manuscript with the suggestions provided. The manuscript can be accepted for publication.

**Our response:** We sincerely thank the reviewer for the positive comments that our work is acceptable.

We also sincerely thank the positive assessments from reviewer 2 in the last revision process that this work is commendable and could provide more insights.

Thanks for their recommendation of this manuscript for acceptance in *Nature Communications*.
